# Supplementary material for: Novel Molecular Markers Linked to Pseudomonas aeruginosa Epidemic High-Risk Clones
Source: Antibiotics (Basel). 2021 Jan 1;10(1):35. doi: 10.3390/antibiotics10010035 (PMC7824207; doi:10.3390/antibiotics10010035)
Supplement: Supplementary file 1 [file antibiotics-10-00035-s001.xlsx]

## Sheet: S1 quinolones
Table S2: Quinolones MIC values for the studied set of sequences and their corresponding STs and serotypes
ST	Genome ID	serogroup	levofloxacin susceptibility	ciprofloxacin susceptibility	levofloxacin MIC	ciprofloxacin MIC
16	287.107	O1	S	UN	0.5	UN
17	287.108	O1	S	UN	0.25	UN
17	287.113	O1	R	UN	2	UN
17	287.1240	O1	R	UN	32	UN
17	287.781	O1	R	R	2	1
17	287.847	O1	R	UN	2	UN
17	287.850	O1	S	UN	0.25	UN
17	287.900	O1	R	UN	32	UN
17	287.983	O1	R	UN	32	UN
17	287.989	O1	S	UN	0.12	UN
17	287.998	O1	S	UN	0.03	UN
27	287.109	O1	S	UN	0.25	UN
27	287.124	O1	R	UN	4	UN
27	287.13	O1	S	UN	1	UN
27	287.777	O1	R	R	4	2
27	287.954	O1	R	UN	32	UN
27	287.987	O1	R	UN	32	UN
108	287.108	O6	S	UN	1	UN
108	287.779	O6	S	S	1	0.5
111	287.1000	O12	R	UN	32	UN
111	287.105	O12	S	UN	1	UN
111	287.108	O12	R	UN	8	UN
111	287.109	O4	R	UN	2	UN
111	287.11	O4	R	UN	8	UN
111	287.11	O4	S	UN	0.25	UN
111	287.113	O12	R	UN	32	UN
111	287.1126	O12	R	UN	32	UN
111	287.113	O12	R	UN	16	UN
111	287.1130	O12	R	UN	32	UN
111	287.1140	O12	R	UN	32	UN
111	287.114	O12	R	UN	32	UN
111	287.115	O12	R	UN	32	UN
111	287.117	O12	R	UN	8	UN
111	287.117	O12	R	UN	8	UN
111	287.118	O12	R	UN	32	UN
111	287.118	O12	R	UN	32	UN
111	287.118	O12	R	UN	16	UN
111	287.12	O12	R	UN	8	UN
111	287.121	O4	R	UN	32	UN
111	287.122	O12	R	UN	32	UN
111	287.5750	O12	R	R	8	8
111	287.6330	O12	R	R	8	8
111	287.7772	O12	R	R	4	2
111	287.786	O4	R	S	2	0.5
111	287.852	O12	R	UN	2	UN
111	287.909	O12	R	UN	16	UN
111	287.911	O12	R	UN	16	UN
111	287.916	O12	R	UN	32	UN
111	287.951	O12	R	UN	8	UN
116	287.105	O3	R	UN	8	UN
116	287.115	O3	R	UN	2	UN
116	287.123	O3	R	UN	4	UN
116	287.880	O3	S	UN	0.5	UN
132	287.107	O6	R	UN	4	UN
132	287.1120	O6	S	UN	0.25	UN
137	287.803	O7	R	R	4	2
146	287.122	O6	R	UN	8	UN
155	287.101	O6	S	UN	0.5	UN
155	287.111	O6	S	UN	0.25	UN
155	287.298	O6	R	R	8	8
155	287.784	O6	S	S	1	0.5
155	287.849	O6	S	UN	0.25	UN
155	287.960	O6	S	UN	0.5	UN
164	287.781	O9	S	S	1	0.5
166	287.78	O6	S	S	1	0.5
167	287.1165	O6	R	UN	32	UN
167	287.121	O6	R	UN	32	UN
175	287.102	O4	R	UN	32	UN
175	287.104	O4	R	UN	32	UN
175	287.105	O4	R	UN	32	UN
175	287.105	O4	R	UN	32	UN
175	287.113	O4	R	UN	32	UN
175	287.119	O4	R	UN	8	UN
175	287.119	O4	R	UN	8	UN
175	287.908	O4	R	UN	32	UN
179	287.11	O6	R	UN	32	UN
179	287.114	O11	R	UN	32	UN
179	287.1143	O6	R	UN	32	UN
179	287.117	O6	R	UN	2	UN
179	287.124	O6	R	UN	8	UN
179	287.575	O6	R	R	8	8
179	287.597	O6	S	S	0.5	0.25
179	287.803	O6	S	S	1	0.5
179	287.980	O6	S	UN	0.12	UN
179	287.988	O6	S	UN	0.5	UN
192	287.148	O6	R	R	4	1
192	287.782	O6	S	S	1	0.5
207	287.784	O1	S	S	1	0.5
211	287.782	O6	R	R	4	2
217	287.112	O3	R	UN	8	UN
231	287.923	O7	S	UN	0.5	UN
233	287.1	O6	R	UN	32	UN
233	287.101	O6	R	UN	32	UN
233	287.112	O6	R	UN	32	UN
233	287.114	O6	R	UN	16	UN
233	287.12	O6	R	UN	8	UN
233	287.2980	O6	R	R	8	8
233	287.569	O6	R	R	8	8
233	287.5752	O6	R	R	8	8
233	287.596	O6	R	R	8	8
233	287.649	O6	R	R	8	8
233	287.889	O6	R	UN	32	UN
233	287.934	O6	R	UN	32	UN
233	287.991	O6	S	UN	0.25	UN
234	287.870	O4	S	UN	0.25	UN
235	287.102	O11	R	UN	32	UN
235	287.103	O11	S	UN	0.06	UN
235	287.104	O11	R	UN	32	UN
235	287.106	O11	R	UN	32	UN
235	287.109	O11	R	UN	32	UN
235	287.109	O11	R	UN	32	UN
235	287.1100	O11	R	UN	32	UN
235	287.112	O11	S	UN	0.25	UN
235	287.1124	O11	R	UN	8	UN
235	287.113	O11	R	UN	32	UN
235	287.113	O11	R	UN	32	UN
235	287.113	O11	R	UN	32	UN
235	287.1134	O11	R	UN	32	UN
235	287.113	O11	R	UN	32	UN
235	287.114	O11	R	UN	32	UN
235	287.115	O11	R	UN	32	UN
235	287.115	O11	R	UN	32	UN
235	287.115	O11	R	UN	32	UN
235	287.1150	O11	R	UN	32	UN
235	287.115	O11	R	UN	32	UN
235	287.116	O11	R	UN	32	UN
235	287.116	O11	R	UN	32	UN
235	287.116	O11	R	UN	32	UN
235	287.118	O11	R	UN	32	UN
235	287.1200	O11	R	UN	8	UN
235	287.12	O11	R	UN	32	UN
235	287.12	O11	R	UN	32	UN
235	287.121	O11	R	UN	32	UN
235	287.297	O11	R	R	8	8
235	287.298	O11	R	R	8	8
235	287.298	O11	R	R	8	8
235	287.5686	O11	R	R	8	8
235	287.5690	O11	R	R	8	8
235	287.633	O11	R	R	8	8
235	287.633	O11	R	R	8	8
235	287.7780	O11	R	R	4	2
235	287.778	O11	R	R	4	2
235	287.778	O11	R	R	4	2
235	287.779	O11	R	R	4	2
235	287.779	O11	R	R	4	2
235	287.7830	O11	R	R	4	2
235	287.855	O11	R	UN	128	UN
235	287.860	O11	S	UN	0.015	UN
235	287.902	O10	R	UN	4	UN
235	287.903	O11	R	UN	32	UN
235	287.915	O11	R	UN	4	UN
235	287.918	O11	R	UN	32	UN
235	287.955	O11	R	UN	32	UN
235	287.966	O11	R	UN	32	UN
235	287.984	O11	S	UN	0.12	UN
241	287.102	O6	S	UN	1	UN
241	287.784	O6	S	S	1	0.5
242	287.12	O1	R	UN	4	UN
244	287.103	O2	R	UN	32	UN
244	287.1060	O12	R	UN	32	UN
244	287.106	O2	S	UN	0.015	UN
244	287.109	O2	S	UN	0.25	UN
244	287.11	O12	R	UN	32	UN
244	287.11	O12	R	UN	32	UN
244	287.121	O12	R	UN	32	UN
244	287.778	O12	R	R	4	2
244	287.781	O2	R	R	4	2
244	287.897	O12	R	UN	32	UN
244	287.905	O2	S	UN	0.25	UN
244	287.956	O12	R	UN	16	UN
244	287.975	O11	R	UN	8	UN
245	287.57	O5	R	R	8	8
245	287.888	O2	R	UN	16	UN
252	287.1220	O1	R	UN	8	UN
252	287.783	O1	R	R	4	2
252	287.906	O1	S	UN	0.5	UN
253	287.103	O10	S	UN	0.5	UN
253	287.108	O10	R	UN	2	UN
253	287.108	O10	S	UN	1	UN
253	287.115	O10	R	UN	2	UN
253	287.116	O10	R	UN	2	UN
253	287.784	O10	R	R	2	1
253	287.7850	O10	R	R	4	2
253	287.873	O10	S	UN	1	UN
253	287.893	O10	S	UN	0.5	UN
253	287.894	O10	S	UN	0.25	UN
253	287.907	O10	R	UN	2	UN
253	287.912	O11	R	UN	32	UN
253	287.985	O10	S	UN	1	UN
257	287.1170	O6	S	UN	0.5	UN
260	287.109	O6	R	UN	2	UN
260	287.978	O6	S	UN	0.5	UN
261	287.853	O6	R	UN	16	UN
262	287.104	O6	S	UN	0.5	UN
266	287.1	O6	R	UN	4	UN
267	287.101	O2	S	UN	0.25	UN
267	287.102	O2	R	UN	32	UN
270	287.977	O2	R	UN	4	UN
274	287.101	O3	R	UN	32	UN
274	287.102	O3	R	UN	32	UN
274	287.123	O3	S	UN	0.25	UN
274	287.597	O3	R	S	2	0.5
274	287.784	O3	R	R	4	2
274	287.846	O3	S	UN	1	UN
274	287.878	O3	R	UN	8	UN
274	287.885	O3	S	UN	0.03	UN
274	287.953	O3	S	UN	0.5	UN
274	287.963	O3	S	UN	0.12	UN
277	287.1010	O2	R	UN	32	UN
277	287.108	O2	R	UN	32	UN
277	287.111	O2	R	UN	32	UN
277	287.111	O2	R	UN	32	UN
277	287.111	O2	R	UN	32	UN
277	287.123	O2	S	UN	0.25	UN
277	287.298	O5	R	R	8	8
282	287.781	O6	R	R	4	2
285	287.979	O9	R	UN	16	UN
292	287.118	O12	R	UN	32	UN
298	287.106	O11	R	UN	32	UN
298	287.118	O11	R	UN	16	UN
298	287.597	O11	R	R	4	1
298	287.864	O11	R	UN	16	UN
298	287.871	O11	R	UN	32	UN
298	287.884	O11	R	UN	16	UN
298	287.931	O11	S	UN	0.5	UN
308	287.104	O11	S	UN	0.25	UN
308	287.107	O11	R	UN	32	UN
308	287.11	O11	S	UN	0.25	UN
308	287.11	O11	R	UN	32	UN
308	287.112	O11	S	UN	0.03	UN
308	287.114	O11	R	UN	16	UN
308	287.114	O11	R	UN	16	UN
308	287.121	O11	R	UN	32	UN
308	287.569	O11	R	R	8	8
308	287.633	O11	R	R	8	8
308	287.913	O11	R	UN	32	UN
308	287.964	O11	R	UN	32	UN
308	287.965	O11	R	UN	32	UN
308	287.995	O11	R	UN	16	UN
309	287.115	O11	R	UN	32	UN
309	287.1160	O11	R	UN	32	UN
309	287.7820	O11	R	S	2	0.5
309	287.879	O11	S	UN	0.06	UN
309	287.899	O11	S	UN	0.25	UN
313	287.1	O1	S	UN	0.5	UN
313	287.1040	O1	S	UN	1	UN
313	287.119	O1	S	UN	0.25	UN
313	287.12	O1	R	UN	2	UN
313	287.859	O1	S	UN	1	UN
316	287.121	O11	R	UN	4	UN
316	287.148	O11	R	R	4	2
316	287.781	O11	R	R	4	2
316	287.927	O11	S	UN	0.25	UN
319	287.106	O11	R	UN	32	UN
319	287.12	O11	R	UN	8	UN
319	287.851	O11	R	UN	2	UN
319	287.867	O11	R	UN	8	UN
319	287.928	O11	S	UN	0.5	UN
347	287.78	O6	S	S	1	0.5
348	287.11	O2	S	UN	0.5	UN
348	287.115	O2	R	UN	8	UN
348	287.117	O2	R	UN	8	UN
348	287.118	O2	S	UN	0.5	UN
348	287.125	O2	R	UN	2	UN
348	287.786	O5	R	R	4	2
348	287.858	O2	R	UN	32	UN
348	287.920	O10	S	UN	0.25	UN
348	287.993	O2	R	UN	32	UN
357	287.107	O11	R	UN	32	UN
357	287.107	O11	R	UN	32	UN
357	287.57	O11	R	R	8	8
357	287.575	O11	R	R	8	8
357	287.575	O11	R	R	8	8
357	287.785	O11	R	R	4	2
357	287.929	O11	R	UN	8	UN
360	287.868	O2	S	UN	0.25	UN
360	287.886	O2	S	UN	0.5	UN
365	287.119	O3	S	UN	0.25	UN
369	287.101	O6	S	UN	0.25	UN
377	287.101	O7	R	UN	8	UN
381	287.106	O2	S	UN	0.25	UN
381	287.119	O2	S	UN	0.25	UN
381	287.778	O2	R	R	4	2
385	287.112	O6	S	UN	1	UN
386	287.111	O3	S	UN	0.5	UN
387	287.896	O3	R	UN	8	UN
389	287.123	O4	R	UN	4	UN
389	287.1250	O4	R	UN	2	UN
390	287.783	O6	R	R	4	1
395	287.104	O6	S	UN	0.12	UN
395	287.1080	O6	S	UN	0.5	UN
395	287.111	O6	R	UN	2	UN
395	287.111	O6	S	UN	0.5	UN
395	287.112	O6	S	UN	1	UN
395	287.57	O6	R	R	2	1
395	287.575	O6	R	R	2	1
395	287.596	O6	R	R	8	1
395	287.848	O6	S	UN	0.5	UN
395	287.881	O6	S	UN	1	UN
395	287.887	O6	S	UN	0.25	UN
395	287.921	O6	R	UN	4	UN
395	287.961	O6	S	UN	0.25	UN
406	287.882	O1	S	UN	0.5	UN
439	287.124	O6	R	UN	8	UN
446	287.12	O11	R	UN	2	UN
446	287.779	O11	R	R	4	2
446	287.875	O11	S	UN	1	UN
463	287.115	O4	R	UN	2	UN
463	287.784	O4	R	R	4	2
463	287.890	O4	S	UN	1	UN
497	287.778	O6	R	R	4	2
498	287.117	O1	S	UN	0.5	UN
500	287.122	O6	R	UN	4	UN
500	287.972	O6	R	UN	8	UN
527	287.986	O4	R	UN	2	UN
532	287.102	O11	R	UN	2	UN
532	287.778	O11	R	R	4	2
532	287.971	O11	S	UN	0.25	UN
557	287.919	O7	S	UN	0.5	UN
560	287.103	O7	R	UN	2	UN
560	287.103	O7	R	UN	2	UN
560	287.883	O7	R	UN	16	UN
569	287.123	O3	R	UN	4	UN
569	287.869	O3	S	UN	0.5	UN
606	287.104	O13	R	UN	2	UN
606	287.105	O13	R	UN	32	UN
620	287.578	O11	R	R	8	8
621	287.1070	O4	R	UN	32	UN
621	287.7860	O4	R	R	4	2
621	287.982	O4	R	UN	32	UN
621	287.996	O4	R	UN	32	UN
633	287.101	O6	R	UN	2	UN
633	287.103	O6	S	UN	0.12	UN
633	287.782	O6	S	S	1	0.5
633	287.857	O6	S	UN	0.25	UN
635	287.862	O6	R	UN	4	UN
639	287.108	O4	R	UN	32	UN
640	287.107	O11	S	UN	0.5	UN
640	287.1156	O11	R	UN	4	UN
644	287.856	O11	S	UN	0.25	UN
646	287.785	O7	S	S	1	0.5
646	287.922	O7	S	UN	0.5	UN
654	287.118	O4	R	UN	8	UN
654	287.298	O4	R	R	8	8
654	287.781	O4	R	R	4	2
655	287.121	O2	S	UN	0.5	UN
663	287.78	O6	R	R	2	1
671	287.111	O10	S	UN	1	UN
677	287.781	O6	R	R	4	2
699	287.782	O2	S	S	1	0.5
699	287.865	O2	S	UN	0.25	UN
701	287.105	O3	S	UN	0.12	UN
767	287.109	O2	R	UN	16	UN
769	287.932	O2	R	UN	2	UN
773	287.104	O11	S	UN	0.5	UN
773	287.1190	O11	S	UN	0.5	UN
773	287.974	O11	R	UN	8	UN
782	287.123	O6	R	UN	32	UN
782	287.123	O6	R	UN	16	UN
782	287.123	O6	R	UN	32	UN
782	287.125	O6	S	UN	0.12	UN
823	287.1210	O11	R	UN	32	UN
823	287.121	O11	R	UN	32	UN
827	287.7810	O5	S	S	1	0.5
829	287.785	O6	R	R	4	2
845	287.781	O1	S	S	1	0.5
847	287.116	O9	S	UN	0.5	UN
865	287.1050	O6	R	UN	8	UN
871	287.117	O6	R	UN	8	UN
875	287.785	O6	S	S	1	0.5
879	287.959	O3	S	UN	0.5	UN
883	287.106	O6	S	UN	0.25	UN
885	287.106	O11	S	UN	0.25	UN
908	287.123	O2	R	UN	4	UN
915	287.1180	O3	R	UN	32	UN
964	287.297	O4	R	R	8	8
968	287.104	O1	S	UN	0.5	UN
1006	287.569	O12	S	S	0.5	0.25
1006	287.575	O12	R	R	2	1
1011	287.123	O9	S	UN	0.25	UN
1033	287.904	O4	S	UN	0.5	UN
1053	287.119	O2	S	UN	0.5	UN
1074	287.782	O6	R	R	4	2
1076	287.930	O11	R	UN	2	UN
1076	287.933	O11	S	UN	0.12	UN
1086	287.891	O7	S	UN	0.5	UN
1090	287.116	O6	R	UN	32	UN
1090	287.970	O6	R	UN	2	UN
1101	287.107	O6	S	UN	0.5	UN
1105	287.783	O13	S	S	1	0.5
1122	287.1110	O11	S	UN	0.5	UN
1129	287.777	O6	R	R	4	2
1184	287.105	O9	S	UN	1	UN
1229	287.785	O3	S	R	1	1
1239	287.123	O6	R	UN	4	UN
1248	287.119	O1	S	UN	0.5	UN
1284	287.107	O11	S	UN	0.25	UN
1284	287.910	O11	R	UN	32	UN
1295	287.958	O4	R	UN	32	UN
1320	287.874	O2	S	UN	0.12	UN
1337	287.783	O6	R	R	4	2
1400	287.118	O1	S	UN	0.25	UN
1414	287.786	O1	S	S	1	0.5
1419	287.777	O11	R	R	4	2
1420	287.952	O4	S	UN	0.5	UN
1437	287.957	O1	S	UN	0.25	UN
1503	287.777	O1	R	R	4	2
1560	287.854	O4	R	UN	32	UN
1567	287.962	O11	S	UN	1	UN
1601	287.779	O11	R	S	4	0.5
1605	287.101	O9	S	UN	0.25	UN
1605	287.102	O9	R	UN	4	UN
1654	287.778	O11	S	S	1	0.5
1684	287.104	O2	S	UN	0.5	UN
1684	287.112	O2	S	UN	0.5	UN
1685	287.786	O5	R	R	2	1
1712	287.5685	O6	S	S	0.5	0.5
1721	287.1030	O10	S	UN	0.5	UN
1743	287.990	O6	S	UN	0.06	UN
1750	287.102	O3	R	UN	32	UN
1800	287.101	O4	S	UN	0.5	UN
1800	287.1020	O4	S	UN	0.5	UN
1858	287.1102	O4	S	UN	1	UN
1960	287.1090	O7	R	UN	4	UN
2021	287.108	O11	R	UN	2	UN
2031	287.781	O12	R	R	4	2
2055	287.926	O3	S	UN	0.5	UN
2065	287.782	O6	S	S	1	0.5
2069	287.103	O6	S	UN	0.25	UN
2069	287.981	O6	S	UN	0.5	UN
2105	287.122	O6	R	UN	4	UN
2123	287.124	O9	R	UN	8	UN
2132	287.803	O3	R	R	4	2
2140	287.122	O2	R	UN	2	UN
2142	287.784	O11	R	R	2	1
2211	287.876	O11	S	UN	0.25	UN
2238	287.872	O6	R	UN	8	UN
2387	287.786	O6	R	S	2	0.5
2410	287.924	O6	S	UN	1	UN
2410	287.976	O3	R	UN	2	UN
2476	287.861	O3	R	UN	8	UN
2572	287.106	O1	S	UN	0.25	UN
2572	287.78	O1	R	R	2	2
2615	287.117	O6	S	UN	0.5	UN
2625	287.108	O6	S	UN	0.5	UN
2633	287.124	O6	R	UN	16	UN
2705	287.125	O6	R	UN	4	UN
2706	287.125	O11	R	UN	4	UN
2707	287.125	O6	R	UN	4	UN
2708	287.122	O4	S	UN	0.015	UN
2708	287.122	O4	R	UN	2	UN
2708	287.122	O4	R	UN	16	UN
2711	287.119	O2	S	UN	1	UN
2712	287.118	O12	R	UN	16	UN
2714	287.111	O6	R	UN	8	UN
2715	287.108	O3	S	UN	0.25	UN
2717	287.106	O6	S	UN	0.5	UN
2718	287.101	O6	S	UN	0.5	UN
2719	287.994	O6	R	UN	4	UN
2720	287.973	O9	S	UN	0.5	UN
2721	287.967	O2	S	UN	1	UN
2722	287.917	O2	S	UN	0.5	UN
2723	287.895	O3	R	UN	4	UN
2724	287.892	O1	S	UN	0.25	UN
2725	287.877	O13	S	UN	0.25	UN
2726	287.866	O11	S	UN	0.25	UN
2727	287.863	O4	S	UN	0.5	UN
2731	287.116	O6	R	UN	32	UN
2850	287.914	O11	S	UN	0.5	UN
2851	287.779	O9	S	R	1	1
2855	287.785	O4	R	R	4	2
2865	287.7790	O4	R	R	4	1
2952	287.783	O1	S	S	1	0.5
3002	287.78	O5	R	R	4	2
3003	287.786	O11	R	R	4	2
3004	287.783	O5	R	R	4	2
3005	287.783	O6	R	R	4	2
3006	287.782	O6	R	R	4	2
3007	287.803	O3	S	S	1	0.5
3008	287.782	O5	S	S	1	0.5
3009	287.784	O11	R	R	2	2
3010	287.781	O6	R	R	4	2
3011	287.783	O6	S	S	1	0.5
3012	287.78	O1	R	R	4	2
3013	287.78	O1	R	R	4	2
3014	287.779	O5	R	R	4	2
3015	287.78	O6	S	S	1	0.5
3030	287.786	O7	S	S	1	0.5
3031	287.785	O10	S	S	1	0.5
3032	287.783	O5	S	S	1	0.5
3033	287.7840	O4	R	R	4	2
3034	287.784	O4	R	R	2	1
3035	287.8030	O6	S	S	1	0.5
3036	287.779	O6	R	R	4	2
3037	287.803	O3	R	R	4	2
3038	287.7838	O11	R	R	4	2
3039	287.7800	O13	R	R	4	2
3040	287.785	O6	R	R	4	2
3041	287.803	O6	R	R	4	2
3042	287.803	O4	R	R	4	2
3043	287.778	O12	R	R	4	2
3043	287.779	O12	R	R	4	2
3045	287.779	O4	R	S	2	0.5
3119	287.105	O3	S	UN	0.25	UN
3119	287.12	O3	S	UN	0.25	UN
3170	287.117	O1	S	UN	0.25	UN
2212	287.103	O11	S	UN	0.25	UN
235	287.103	O11	S	UN	0.06	UN
235	287.569	O11	R	R	8	4
252	287.114	O1	R	UN	2	UN
U26	287.1	O6	S	UN	1	UN
U27	287.103	O11	R	UN	32	UN
U28	287.103	O4	S	UN	0.5	UN
U29	287.106	O3	R	UN	4	UN
U30	287.111	O6	R	UN	4	UN
U31	287.12	O7	S	UN	1	UN
U32	287.122	O6	R	UN	4	UN
U33	287.124	O2	S	UN	0.5	UN
U34	287.57	O6	R	R	8	2
U35	287.596	O5	R	R	8	4
U36	287.597	O6	R	R	8	8
U37	287.633	O11	R	R	8	4
U38	287.633	O3	R	R	8	8
U39	287.901	O11	R	UN	2	UN
U40	287.925	O1	R	UN	32	UN
U41	287.968	O6	S	UN	0.25	UN
U42	287.969	O6	S	UN	0.25	UN
U43	287.992	O12	S	UN	1	UN
U44	287.997	O6	R	UN	32	UN
U45	287.999	O6	S	UN	0.25	UN

## Sheet: S2 aminoglycosides
Table S2: Aminoglycosides MIC values for the studied set of sequences and their corresponding STs and serotypes
ST	Genome ID	sergroup	AK MIC	AK susceptibility	CN MIC	CN susceptibility
16	287.107	1	2	2	UN	UN
17	287.108	1	2	2	UN	UN
17	287.113	1	16	1	UN	UN
17	287.1240	1	32	1	UN	UN
17	287.781	1	8	2	4	2
17	287.847	1	4	2	UN	UN
17	287.850	1	2	2	UN	UN
17	287.900	1	2	2	UN	UN
17	287.983	1	2	2	UN	UN
17	287.989	1	0.12	2	UN	UN
17	287.998	1	4	2	UN	UN
27	287.109	1	2	2	UN	UN
27	287.124	1	64	1	UN	UN
27	287.13	1	8	2	UN	UN
27	287.777	1	8	2	4	2
27	287.987	1	4	2	UN	UN
27	287.954	1	4	2	UN	UN
108	287.108	6	4	2	UN	UN
108	287.779	6	8	2	4	2
111	287.1000	12	32	1	UN	UN
111	287.105	12	4	2	UN	UN
111	287.108	12	8	2	UN	UN
111	287.109	4	2	2	UN	UN
111	287.11	4	2	2	UN	UN
111	287.11	4	1	2	UN	UN
111	287.113	12	128	1	UN	UN
111	287.113	12	4	2	UN	UN
111	287.1130	12	4	2	UN	UN
111	287.1140	12	128	1	UN	UN
111	287.114	12	128	1	UN	UN
111	287.115	12	128	1	UN	UN
111	287.117	12	8	2	UN	UN
111	287.117	12	2	2	UN	UN
111	287.118	12	128	1	UN	UN
111	287.118	12	128	1	UN	UN
111	287.118	12	8	2	UN	UN
111	287.12	12	64	1	UN	UN
111	287.121	4	128	1	UN	UN
111	287.122	12	128	1	UN	UN
111	287.5750	12	64	1	16	1
111	287.6330	12	32	1	16	1
111	287.786	4	8	2	4	2
111	287.852	12	4	2	UN	UN
111	287.909	12	1	2	UN	UN
111	287.911	12	1	2	UN	UN
111	287.916	12	64	1	UN	UN
111	287.951	12	16	1	UN	UN
111	287.1126	12	8	2	UN	UN
111	287.7772	12	8	2	16	1
116	287.105	3	16	1	UN	UN
116	287.115	3	2	2	UN	UN
116	287.123	3	128	1	UN	UN
116	287.880	3	4	2	UN	UN
132	287.107	6	4	2	UN	UN
132	287.1120	6	2	2	UN	UN
137	287.803	7	8	2	4	2
146	287.122	6	128	1	UN	UN
155	287.101	6	4	2	UN	UN
155	287.111	6	2	2	UN	UN
155	287.298	6	32	1	16	1
155	287.784	6	8	2	4	2
155	287.849	6	2	2	UN	UN
155	287.960	6	0.5	2	UN	UN
164	287.781	9	8	2	4	2
166	287.78	6	8	2	4	2
167	287.121	6	32	1	UN	UN
167	287.1165	6	128	1	UN	UN
175	287.102	4	4	2	UN	UN
175	287.104	4	4	2	UN	UN
175	287.105	4	4	2	UN	UN
175	287.105	4	4	2	UN	UN
175	287.113	4	2	2	UN	UN
175	287.119	4	4	2	UN	UN
175	287.119	4	4	2	UN	UN
175	287.908	4	2	2	UN	UN
179	287.11	6	4	2	UN	UN
179	287.114	11	16	1	UN	UN
179	287.117	6	2	2	UN	UN
179	287.124	6	8	2	UN	UN
179	287.575	6	64	1	8	1
179	287.597	6	8	2	2	2
179	287.803	6	8	2	4	2
179	287.980	6	2	2	UN	UN
179	287.988	6	4	2	UN	UN
179	287.1143	6	16	1	UN	UN
192	287.148	6	8	2	UN	UN
192	287.782	6	8	2	4	2
207	287.784	1	8	2	4	2
211	287.782	6	8	2	4	2
217	287.112	3	32	1	UN	UN
231	287.923	7	2	2	UN	UN
233	287.1	6	128	1	UN	UN
233	287.101	6	128	1	UN	UN
233	287.112	6	128	1	UN	UN
233	287.114	6	64	1	UN	UN
233	287.12	6	64	1	UN	UN
233	287.2980	6	64	1	16	1
233	287.569	6	64	1	16	1
233	287.596	6	64	1	16	1
233	287.649	6	64	1	16	1
233	287.889	6	128	1	UN	UN
233	287.934	6	128	1	UN	UN
233	287.991	6	1	2	UN	UN
233	287.5752	6	64	1	16	1
234	287.870	4	2	2	UN	UN
235	287.102	11	32	1	UN	UN
235	287.104	11	32	1	UN	UN
235	287.106	11	8	2	UN	UN
235	287.109	11	4	2	UN	UN
235	287.109	11	4	2	UN	UN
235	287.1100	11	32	1	UN	UN
235	287.112	11	8	2	UN	UN
235	287.113	11	8	2	UN	UN
235	287.113	11	16	1	UN	UN
235	287.113	11	8	2	UN	UN
235	287.113	11	4	2	UN	UN
235	287.114	11	0.25	2	UN	UN
235	287.115	11	8	2	UN	UN
235	287.115	11	128	1	UN	UN
235	287.115	11	16	1	UN	UN
235	287.1150	11	16	1	UN	UN
235	287.115	11	8	2	UN	UN
235	287.116	11	32	1	UN	UN
235	287.116	11	16	1	UN	UN
235	287.116	11	128	1	UN	UN
235	287.118	11	4	2	UN	UN
235	287.1200	11	4	2	UN	UN
235	287.12	11	64	1	UN	UN
235	287.12	11	2	2	UN	UN
235	287.121	11	64	1	UN	UN
235	287.297	11	64	1	16	1
235	287.298	11	64	1	16	1
235	287.298	11	8	2	16	1
235	287.5690	11	64	1	16	1
235	287.633	11	2	2	0.5	2
235	287.633	11	8	2	4	2
235	287.7780	11	8	2	16	1
235	287.778	11	8	2	16	1
235	287.778	11	8	2	16	1
235	287.779	11	32	1	16	1
235	287.779	11	8	2	8	1
235	287.7830	11	8	2	4	2
235	287.855	11	64	1	UN	UN
235	287.860	11	1	2	UN	UN
235	287.902	10	4	2	UN	UN
235	287.903	11	8	2	UN	UN
235	287.915	11	128	1	UN	UN
235	287.918	11	16	1	UN	UN
235	287.955	11	8	2	UN	UN
235	287.966	11	1	2	UN	UN
235	287.984	11	32	1	UN	UN
235	287.1124	11	32	1	UN	UN
235	287.1134	11	64	1	UN	UN
241	287.102	6	4	2	UN	UN
241	287.784	6	8	2	4	2
242	287.12	1	2	2	UN	UN
244	287.103	2	2	2	UN	UN
244	287.1060	12	8	2	UN	UN
244	287.106	2	0.5	2	UN	UN
244	287.109	2	1	2	UN	UN
244	287.11	12	32	1	UN	UN
244	287.11	12	64	1	UN	UN
244	287.121	12	32	1	UN	UN
244	287.778	12	32	1	16	1
244	287.781	2	8	2	16	1
244	287.905	2	1	2	UN	UN
244	287.956	12	4	2	UN	UN
244	287.975	11	64	1	UN	UN
244	287.897	12	64	1	UN	UN
245	287.57	5	4	2	2	2
245	287.888	2	8	2	UN	UN
252	287.1220	1	16	1	UN	UN
252	287.783	1	8	2	4	2
252	287.906	1	4	2	UN	UN
253	287.103	10	2	2	UN	UN
253	287.108	10	1	2	UN	UN
253	287.108	10	1	2	UN	UN
253	287.115	10	1	2	UN	UN
253	287.116	10	2	2	UN	UN
253	287.784	10	8	2	UN	UN
253	287.7850	10	16	1	8	1
253	287.894	10	2	2	UN	UN
253	287.907	10	1	2	UN	UN
253	287.912	11	4	2	UN	UN
253	287.985	10	16	1	UN	UN
253	287.873	10	2	2	UN	UN
253	287.893	10	2	2	UN	UN
257	287.1170	6	4	2	UN	UN
260	287.109	6	2	2	UN	UN
260	287.978	6	1	2	UN	UN
261	287.853	6	32	1	UN	UN
262	287.104	6	2	2	UN	UN
266	287.1	6	8	2	UN	UN
267	287.101	2	1	2	UN	UN
267	287.102	2	16	1	UN	UN
270	287.977	2	128	1	UN	UN
274	287.101	3	4	2	UN	UN
274	287.102	3	4	2	UN	UN
274	287.123	3	4	2	UN	UN
274	287.597	3	16	1	8	1
274	287.784	3	8	2	4	2
274	287.846	3	8	2	UN	UN
274	287.878	3	4	2	UN	UN
274	287.885	3	0.25	2	UN	UN
274	287.953	3	4	2	UN	UN
274	287.963	3	0.12	2	UN	UN
277	287.1010	2	128	1	UN	UN
277	287.108	2	128	1	UN	UN
277	287.111	2	128	1	UN	UN
277	287.111	2	128	1	UN	UN
277	287.111	2	128	1	UN	UN
277	287.123	2	8	2	UN	UN
277	287.298	5	1	2	0.5	2
282	287.781	6	8	2	4	2
285	287.979	9	2	2	UN	UN
292	287.118	12	4	2	UN	UN
298	287.106	11	128	1	UN	UN
298	287.118	11	4	2	UN	UN
298	287.597	11	1	2	0.25	2
298	287.864	11	2	2	UN	UN
298	287.871	11	128	1	UN	UN
298	287.884	11	2	2	UN	UN
298	287.931	11	2	2	UN	UN
308	287.104	11	0.5	2	UN	UN
308	287.107	11	0.5	2	UN	UN
308	287.11	11	0.25	2	UN	UN
308	287.11	11	4	2	UN	UN
308	287.112	11	0.5	2	UN	UN
308	287.114	11	128	1	UN	UN
308	287.114	11	64	1	UN	UN
308	287.121	11	64	1	UN	UN
308	287.569	11	64	1	16	1
308	287.633	11	8	2	16	1
308	287.913	11	4	2	UN	UN
308	287.964	11	4	2	UN	UN
308	287.965	11	4	2	UN	UN
308	287.995	11	4	2	UN	UN
309	287.115	11	32	1	UN	UN
309	287.1160	11	64	1	UN	UN
309	287.7820	11	8	2	4	2
309	287.879	11	0.25	2	UN	UN
309	287.899	11	2	2	UN	UN
313	287.1	1	2	2	UN	UN
313	287.1040	1	4	2	UN	UN
313	287.119	1	2	2	UN	UN
313	287.12	1	4	2	UN	UN
313	287.859	1	4	2	UN	UN
316	287.121	11	16.001	1	UN	UN
316	287.148	11	64	1	UN	UN
316	287.781	11	32	1	16	1
316	287.927	11	2	2	UN	UN
319	287.106	11	4	2	UN	UN
319	287.12	11	8	2	UN	UN
319	287.851	11	2	2	UN	UN
319	287.867	11	4	2	UN	UN
319	287.928	11	2	2	UN	UN
347	287.78	6	8	2	4	2
348	287.11	2	8	2	UN	UN
348	287.115	2	1	2	UN	UN
348	287.117	2	2	2	UN	UN
348	287.118	2	0.25	2	UN	UN
348	287.125	2	128	1	UN	UN
348	287.786	5	8	2	8	1
348	287.920	10	1	2	UN	UN
348	287.993	2	4	2	UN	UN
348	287.858	2	4	2	UN	UN
357	287.107	11	128	1	UN	UN
357	287.107	11	2	2	UN	UN
357	287.57	11	8	2	4	2
357	287.575	11	16	1	16	1
357	287.575	11	16	1	4	2
357	287.785	11	16	1	16	1
357	287.929	11	2	2	UN	UN
360	287.868	2	1	2	UN	UN
360	287.886	2	1	2	UN	UN
365	287.119	3	0.5	2	UN	UN
369	287.101	6	1	2	UN	UN
377	287.101	7	2	2	UN	UN
381	287.106	2	1	2	UN	UN
381	287.119	2	2	2	UN	UN
381	287.778	2	8	2	4	2
385	287.112	6	4	2	UN	UN
386	287.111	3	2	2	UN	UN
387	287.896	3	1	2	UN	UN
389	287.123	4	8	2	UN	UN
389	287.1250	4	4	2	UN	UN
390	287.783	6	8	2	4	2
395	287.104	6	2	2	UN	UN
395	287.1080	6	2	2	UN	UN
395	287.111	6	2	2	UN	UN
395	287.111	6	1	2	UN	UN
395	287.112	6	4	2	UN	UN
395	287.57	6	4	2	16	1
395	287.575	6	4	2	16	1
395	287.596	6	16	1	4	2
395	287.887	6	2	2	UN	UN
395	287.921	6	1	2	UN	UN
395	287.961	6	1	2	UN	UN
395	287.848	6	4	2	UN	UN
395	287.881	6	8	2	UN	UN
406	287.882	1	1	2	UN	UN
439	287.124	6	128	1	UN	UN
446	287.12	11	0.12	2	UN	UN
446	287.779	11	8	2	4	2
446	287.875	11	4	2	UN	UN
463	287.115	4	1	2	UN	UN
463	287.784	4	8	2	16	1
463	287.890	4	2	2	UN	UN
497	287.778	6	8	2	4	2
498	287.117	1	4	2	UN	UN
500	287.122	6	32	1	UN	UN
500	287.972	6	1	2	UN	UN
527	287.986	4	16	1	UN	UN
532	287.102	11	2	2	UN	UN
532	287.778	11	8	2	16	1
532	287.971	11	2	2	UN	UN
557	287.919	7	1	2	UN	UN
560	287.103	7	0.25	2	UN	UN
560	287.103	7	1	2	UN	UN
560	287.883	7	2	2	UN	UN
569	287.123	3	32	1	UN	UN
569	287.869	3	2	2	UN	UN
606	287.104	13	2	2	UN	UN
606	287.105	13	0.25	2	UN	UN
620	287.578	11	1	2	0.25	2
621	287.1070	4	8	2	UN	UN
621	287.7860	4	8	2	16	1
621	287.982	4	64	1	UN	UN
621	287.996	4	8	2	UN	UN
633	287.101	6	2	2	UN	UN
633	287.103	6	4	2	UN	UN
633	287.782	6	8	2	4	2
633	287.857	6	2	2	UN	UN
635	287.862	6	4	2	UN	UN
639	287.108	4	64	1	UN	UN
640	287.107	11	2	2	UN	UN
640	287.1156	11	2	2	UN	UN
644	287.856	11	2	2	UN	UN
646	287.785	7	8	2	4	2
646	287.922	7	2	2	UN	UN
654	287.118	4	4	2	UN	UN
654	287.298	4	2	2	16	1
654	287.781	4	16	1	16	1
655	287.121	2	2	2	UN	UN
663	287.78	6	8	2	4	2
671	287.111	10	4	2	UN	UN
677	287.781	6	8	2	16	1
699	287.782	2	8	2	4	2
699	287.865	2	2	2	UN	UN
701	287.105	3	2	2	UN	UN
767	287.109	2	16	1	UN	UN
769	287.932	2	1	2	UN	UN
773	287.104	11	2	2	UN	UN
773	287.1190	11	2	2	UN	UN
773	287.974	11	64	1	UN	UN
782	287.123	6	32	1	UN	UN
782	287.123	6	2	2	UN	UN
782	287.123	6	32	1	UN	UN
782	287.125	6	16	1	UN	UN
823	287.1210	11	32	1	UN	UN
823	287.121	11	32	1	UN	UN
827	287.7810	5	8	2	4	2
829	287.785	6	32	1	16	1
845	287.781	1	8	2	4	2
847	287.116	9	4	2	UN	UN
865	287.1050	6	4	2	UN	UN
871	287.117	6	8	2	UN	UN
875	287.785	6	8	2	4	2
879	287.959	3	2	2	UN	UN
883	287.106	6	2	2	UN	UN
885	287.106	11	4	2	UN	UN
908	287.123	2	64	1	UN	UN
915	287.1180	3	1	2	UN	UN
964	287.297	4	32	1	16	1
968	287.104	1	2	2	UN	UN
1006	287.569	12	2	2	16	1
1006	287.575	12	1	2	16	1
1011	287.123	9	2	2	UN	UN
1033	287.904	4	2	2	UN	UN
1053	287.119	2	2	2	UN	UN
1074	287.782	6	8	2	4	2
1076	287.933	11	2	2	UN	UN
1076	287.930	11	2	2	UN	UN
1086	287.891	7	2	2	UN	UN
1090	287.116	6	4	2	UN	UN
1090	287.970	6	1	2	UN	UN
1101	287.107	6	2	2	UN	UN
1105	287.783	13	8	2	4	2
1122	287.1110	11	2	2	UN	UN
1129	287.777	6	16	1	8	1
1184	287.105	9	4	2	UN	UN
1229	287.785	3	8	2	4	2
1239	287.123	6	4	2	UN	UN
1248	287.119	1	4	2	UN	UN
1284	287.107	11	2	2	UN	UN
1284	287.910	11	1	2	UN	UN
1295	287.958	4	4	2	UN	UN
1320	287.874	2	4	2	UN	UN
1337	287.783	6	8	2	4	2
1400	287.118	1	2	2	UN	UN
1414	287.786	1	8	2	4	2
1419	287.777	11	32	1	16	1
1420	287.952	4	2	2	UN	UN
1437	287.957	1	2	2	UN	UN
1503	287.777	1	8	2	4	2
1560	287.854	4	4	2	UN	UN
1567	287.962	11	1	2	UN	UN
1601	287.779	11	8	2	4	2
1605	287.101	9	2	2	UN	UN
1605	287.102	9	64	1	UN	UN
1654	287.778	11	8	2	4	2
1684	287.104	2	2	2	UN	UN
1684	287.112	2	1	2	UN	UN
1685	287.786	5	16	1	8	1
1712	287.5685	6	4	2	1	2
1721	287.1030	10	1	2	UN	UN
1743	287.990	6	1	2	UN	UN
1750	287.102	3	8	2	UN	UN
1800	287.101	4	2	2	UN	UN
1800	287.1020	4	2	2	UN	UN
1858	287.1102	4	4	2	UN	UN
1960	287.1090	7	32	1	UN	UN
2021	287.108	11	2	2	UN	UN
2031	287.781	12	8	2	4	2
2055	287.926	3	1	2	UN	UN
2065	287.782	6	8	2	4	2
2069	287.103	6	2	2	UN	UN
2069	287.981	6	2	2	UN	UN
2105	287.122	6	16	1	UN	UN
2123	287.124	9	128	1	UN	UN
2132	287.803	3	8	2	4	2
2140	287.122	2	32	1	UN	UN
2142	287.784	11	8	2	4	2
2211	287.876	11	1	2	UN	UN
2238	287.872	6	16	1	UN	UN
2387	287.786	6	8	2	4	2
2410	287.924	6	1	2	UN	UN
2410	287.976	3	2	2	UN	UN
2476	287.861	3	4	2	UN	UN
2572	287.106	1	2	2	UN	UN
2572	287.78	1	8	2	4	2
2615	287.117	6	4	2	UN	UN
2625	287.108	6	0.5	2	UN	UN
2633	287.124	6	128	1	UN	UN
2705	287.125	6	64	1	UN	UN
2706	287.125	11	128	1	UN	UN
2707	287.125	6	16	1	UN	UN
2708	287.122	4	64	1	UN	UN
2708	287.122	4	32	1	UN	UN
2708	287.122	4	64	1	UN	UN
2711	287.119	2	4	2	UN	UN
2712	287.118	12	128	1	UN	UN
2714	287.111	6	2	2	UN	UN
2715	287.108	3	2	2	UN	UN
2717	287.106	6	2	2	UN	UN
2718	287.101	6	2	2	UN	UN
2719	287.994	6	16	1	UN	UN
2720	287.973	9	2	2	UN	UN
2721	287.967	2	1	2	UN	UN
2722	287.917	2	2	2	UN	UN
2723	287.895	3	2	2	UN	UN
2724	287.892	1	1	2	UN	UN
2725	287.877	13	2	2	UN	UN
2726	287.866	11	2	2	UN	UN
2727	287.863	4	4	2	UN	UN
2731	287.116	6	128	1	UN	UN
2850	287.914	11	2	2	UN	UN
2851	287.779	9	8	2	4	2
2855	287.785	4	8	2	4	2
2865	287.7790	4	8	2	4	2
2952	287.783	1	8	2	4	2
3002	287.78	5	8	2	4	2
3003	287.786	11	8	2	4	2
3004	287.783	5	8	2	4	2
3005	287.783	6	8	2	4	2
3006	287.782	6	16	1	8	1
3007	287.803	3	8	2	4	2
3008	287.782	5	8	2	4	2
3009	287.784	11	8	2	4	2
3010	287.781	6	8	2	4	2
3011	287.783	6	8	2	4	2
3012	287.78	1	16	1	8	1
3013	287.78	1	8	2	4	2
3014	287.779	5	8	2	16	1
3015	287.78	6	8	2	4	2
3030	287.786	7	8	2	4	2
3031	287.785	10	8	2	4	2
3032	287.783	5	8	2	4	2
3033	287.7840	4	32	1	16	1
3034	287.784	4	8	2	4	2
3035	287.8030	6	8	2	4	2
3036	287.779	6	32	1	16	1
3037	287.803	3	8	2	4	2
3038	287.7838	11	8	2	4	2
3039	287.7800	13	8	2	8	1
3040	287.785	6	32	1	16	1
3041	287.803	6	32	1	4	2
3042	287.803	4	8	2	4	2
3043	287.778	12	8	2	16	1
3043	287.779	12	8	2	16	1
3045	287.779	4	8	2	16	1
3119	287.105	3	4	2	UN	UN
3119	287.12	3	0.5	2	UN	UN
3170	287.117	1	1	2	UN	UN
2212	287.103	11	2	2	UN	UN
235	287.103	11	32	1	UN	UN
235	287.569	11	8	2	16	1
252*	287.114	1	4	2	UN	UN
U26	287.1	6	1	2	UN	UN
U27	287.103	11	8	2	UN	UN
U28	287.103	4	2	2	UN	UN
U29	287.106	3	8	2	UN	UN
U30	287.111	6	8	2	UN	UN
U31	287.12	7	2	2	UN	UN
U32	287.122	6	16	1	UN	UN
U33	287.124	2	8	2	UN	UN
U34	287.57	6	64	1	16	1
U35	287.596	5	4	2	2	2
U36	287.597	6	64	1	16	1
U37	287.633	11	8	2	4	2
U38	287.633	3	2	2	1	2
U39	287.901	11	4	2	UN	UN
U40	287.925	1	2	2	UN	UN
U41	287.968	6	1	2	UN	UN
U42	287.969	6	1	2	UN	UN
U43	287.992	12	1	2	UN	UN
U44	287.997	6	0.5	2	UN	UN
U45	287.999	6	2	2	UN	UN

## Sheet: S3 Sequences studied
Table S3: ID of studied set of sequences from the Patric database and their accession numbers
Genome ID	Genome Status	Strain		Publication	BioProject Accession	BioSample Accession	Assembly Accession		GenBank Accessions			Genome Length	GC Content	PATRIC CDS
1611770.3	Complete	MRSN12121			PRJNA273956	SAMN03316900	GCF_000931465.1		CP010892,CP010893,CP010894			6986763	63.79	6598
287.1000	WGS	AZPAE14933		25367914	PRJNA264310	SAMN03105631	GCA_000794085.1		JTRI00000000			7092428	65.74	6615
287.1001	WGS	AZPAE14932		25367914	PRJNA264310	SAMN03105630	GCA_000793685.1		JTRJ00000000			6638040	66.21	6209
287.1002	WGS	AZPAE14931		25367914	PRJNA264310	SAMN03105629	GCA_000793765.1		JTRK00000000			6359186	66.43	5919
287.1003	WGS	AZPAE14930		25367914	PRJNA264310	SAMN03105628	GCA_000793865.1		JTRL00000000			6302622	66.48	5870
287.1004	WGS	AZPAE14929		25367914	PRJNA264310	SAMN03105627	GCA_000789535.1		JTRM00000000			6750744	66.09	6255
287.1005	WGS	AZPAE14928		25367914	PRJNA264310	SAMN03105626	GCA_000791325.1		JTRN00000000			6257878	66.55	5837
287.1006	WGS	AZPAE14927		25367914	PRJNA264310	SAMN03105625	GCA_000791305.1		JTRO00000000			6885375	65.93	6436
287.1007	WGS	AZPAE14926		25367914	PRJNA264310	SAMN03105624	GCA_000791275.1		JTRP00000000			6886320	65.94	6426
287.1008	WGS	AZPAE14925		25367914	PRJNA264310	SAMN03105623	GCA_000791265.1		JTRQ00000000			6462755	66.29	6011
287.1009	WGS	AZPAE14924		25367914	PRJNA264310	SAMN03105622	GCA_000791225.1		JTRR00000000			7042302	65.8	6513
287.1010	WGS	AZPAE14923		25367914	PRJNA264310	SAMN03105621	GCA_000791205.1		JTRS00000000			6724711	66.11	6288
287.1011	WGS	AZPAE14922		25367914	PRJNA264310	SAMN03105620	GCA_000791185.1		JTRT00000000			6839077	65.98	6373
287.1012	WGS	AZPAE14921		25367914	PRJNA264310	SAMN03105619	GCA_000793825.1		JTRU00000000			6815406	65.99	6295
287.1013	WGS	AZPAE14920		25367914	PRJNA264310	SAMN03105618	GCA_000793745.1		JTRV00000000			6882761	66.06	6400
287.1014	WGS	AZPAE14919		25367914	PRJNA264310	SAMN03105617	GCA_000789815.1		JTRW00000000			6284486	66.28	5790
287.1015	WGS	AZPAE14918		25367914	PRJNA264310	SAMN03105616	GCA_000789545.1		JTRX00000000			6318316	66.47	5882
287.1016	WGS	AZPAE14917		25367914	PRJNA264310	SAMN03105615	GCA_000793665.1		JTRY00000000			6308307	66.52	5877
287.1017	WGS	AZPAE14916		25367914	PRJNA264310	SAMN03105614	GCA_000794005.1		JTRZ00000000			6242056	66.5	5809
287.1018	WGS	AZPAE14915		25367914	PRJNA264310	SAMN03105613	GCA_000789885.1		JTSA00000000			6880572	65.9	6419
287.1019	WGS	AZPAE14914		25367914	PRJNA264310	SAMN03105612	GCA_000793885.1		JTSB00000000			6858678	65.91	6376
287.1020	WGS	AZPAE14913		25367914	PRJNA264310	SAMN03105611	GCA_000793845.1		JTSC00000000			6454858	66.27	5999
287.1021	WGS	AZPAE14912		25367914	PRJNA264310	SAMN03105610	GCA_000794055.1		JTSD00000000			6835920	66.08	6339
287.1022	WGS	AZPAE14911		25367914	PRJNA264310	SAMN03105609	GCA_000793985.1		JTSE00000000			6808509	65.93	6355
287.1023	WGS	AZPAE14910		25367914	PRJNA264310	SAMN03105608	GCA_000789975.1		JTSF00000000			6253654	66.5	5816
287.1024	WGS	AZPAE14909		25367914	PRJNA264310	SAMN03105607	GCA_000789525.1		JTSG00000000			7056926	65.94	6601
287.1025	WGS	AZPAE14908		25367914	PRJNA264310	SAMN03105606	GCA_000793805.1		JTSH00000000			6815570	66.14	6349
287.1026	WGS	AZPAE14907		25367914	PRJNA264310	SAMN03105605	GCA_000793705.1		JTSI00000000			6392112	66.38	5923
287.1027	WGS	AZPAE14906		25367914	PRJNA264310	SAMN03105604	GCA_000793915.1		JTSJ00000000			6690011	66.19	6222
287.1028	WGS	AZPAE14905		25367914	PRJNA264310	SAMN03105603	GCA_000793615.1		JTSK00000000			6692731	66.2	6238
287.1029	WGS	AZPAE14904		25367914	PRJNA264310	SAMN03105602	GCA_000791155.1		JTSL00000000			6937853	65.87	6501
287.1030	WGS	AZPAE14903		25367914	PRJNA264310	SAMN03105601	GCA_000791145.1		JTSM00000000			6846030	65.86	6280
287.1031	WGS	AZPAE14902		25367914	PRJNA264310	SAMN03105600	GCA_000791125.1		JTSN00000000			6886932	66.05	6387
287.1032	WGS	AZPAE14901		25367914	PRJNA264310	SAMN03105599	GCA_000791105.1		JTSO00000000			6881448	66.13	6388
287.1033	WGS	AZPAE14900		25367914	PRJNA264310	SAMN03105598	GCA_000791085.1		JTSP00000000			6851898	65.79	6335
287.1034	WGS	AZPAE14899		25367914	PRJNA264310	SAMN03105597	GCA_000791065.1		JTSQ00000000			6470623	66.16	5987
287.1035	WGS	AZPAE14898		25367914	PRJNA264310	SAMN03105596	GCA_000791035.1		JTSR00000000			6577690	66.12	6101
287.1036	WGS	AZPAE14897		25367914	PRJNA264310	SAMN03105595	GCA_000791025.1		JTSS00000000			6448155	66.24	5998
287.1037	WGS	AZPAE14895		25367914	PRJNA264310	SAMN03105594	GCA_000790965.1		JTST00000000			6330823	66.42	5887
287.1038	WGS	AZPAE14894		25367914	PRJNA264310	SAMN03105593	GCA_000790935.1		JTSU00000000			7003752	65.96	6554
287.1039	WGS	AZPAE14893		25367914	PRJNA264310	SAMN03105592	GCA_000790905.1		JTSV00000000			6769601	65.96	6303
287.1040	WGS	AZPAE14892		25367914	PRJNA264310	SAMN03105591	GCA_000790885.1		JTSW00000000			6609151	66.05	6130
287.1041	WGS	AZPAE14891		25367914	PRJNA264310	SAMN03105590	GCA_000790865.1		JTSX00000000			6447447	66.38	5967
287.1042	WGS	AZPAE14890		25367914	PRJNA264310	SAMN03105589	GCA_000790825.1		JTSY00000000			7016044	65.97	6584
287.1043	WGS	AZPAE14889		25367914	PRJNA264310	SAMN03105588	GCA_000790805.1		JTSZ00000000			6479466	66.26	5994
287.1044	WGS	AZPAE14888		25367914	PRJNA264310	SAMN03105587	GCA_000790785.1		JTTA00000000			6680559	66.15	6229
287.1045	WGS	AZPAE14887		25367914	PRJNA264310	SAMN03105586	GCA_000790725.1		JTTB00000000			6903570	66.01	6410
287.1046	WGS	AZPAE14886		25367914	PRJNA264310	SAMN03105585	GCA_000790705.1		JTTC00000000			7057811	65.77	6572
287.1047	WGS	AZPAE14885		25367914	PRJNA264310	SAMN03105584	GCA_000790685.1		JTTD00000000			6406036	66.22	5953
287.1048	WGS	AZPAE14884		25367914	PRJNA264310	SAMN03105583	GCA_000790655.1		JTTE00000000			6434371	66.45	5981
287.1049	WGS	AZPAE14883		25367914	PRJNA264310	SAMN03105582	GCA_000790645.1		JTTF00000000			6309393	66.42	5856
287.1050	WGS	AZPAE14882		25367914	PRJNA264310	SAMN03105581	GCA_000790605.1		JTTG00000000			6455645	66.42	6021
287.1051	WGS	AZPAE14881		25367914	PRJNA264310	SAMN03105580	GCA_000790565.1		JTTH00000000			6703242	66.06	6277
287.1052	WGS	AZPAE14880		25367914	PRJNA264310	SAMN03105579	GCA_000790545.1		JTTI00000000			6864526	66.11	6420
287.1053	WGS	AZPAE14879		25367914	PRJNA264310	SAMN03105578	GCA_000790525.1		JTTJ00000000			6226729	66.54	5788
287.1054	WGS	AZPAE14878		25367914	PRJNA264310	SAMN03105577	GCA_000790505.1		JTTK00000000			6953921	65.92	6510
287.1055	WGS	AZPAE14877		25367914	PRJNA264310	SAMN03105576	GCA_000790485.1		JTTL00000000			6300065	66.37	5900
287.1056	WGS	AZPAE14876		25367914	PRJNA264310	SAMN03105575	GCA_000790445.1		JTTM00000000			6386042	66.4	5910
287.1057	WGS	AZPAE14875		25367914	PRJNA264310	SAMN03105574	GCA_000790425.1		JTTN00000000			6980738	65.87	6541
287.1058	WGS	AZPAE14874		25367914	PRJNA264310	SAMN03105573	GCA_000790405.1		JTTO00000000			6850351	66.05	6370
287.1059	WGS	AZPAE14873		25367914	PRJNA264310	SAMN03105572	GCA_000790385.1		JTTP00000000			6259215	66.47	5828
287.1060	WGS	AZPAE14872		25367914	PRJNA264310	SAMN03105571	GCA_000790355.1		JTTQ00000000			7250921	65.47	6723
287.1061	WGS	AZPAE14871		25367914	PRJNA264310	SAMN03105570	GCA_000790325.1		JTTR00000000			7054233	65.55	6414
287.1062	WGS	AZPAE14870		25367914	PRJNA264310	SAMN03105569	GCA_000790305.1		JTTS00000000			6899104	66.03	6448
287.1063	WGS	AZPAE14869		25367914	PRJNA264310	SAMN03105568	GCA_000790265.1		JTTT00000000			6796086	66.04	6333
287.1064	WGS	AZPAE14868		25367914	PRJNA264310	SAMN03105567	GCA_000790245.1		JTTU00000000			6390696	66.38	5961
287.1065	WGS	AZPAE14867		25367914	PRJNA264310	SAMN03105566	GCA_000790215.1		JTTV00000000			6785052	65.93	6283
287.1066	WGS	AZPAE14866		25367914	PRJNA264310	SAMN03105565	GCA_000790205.1		JTTW00000000			6452948	66.3	6001
287.1067	WGS	AZPAE14865		25367914	PRJNA264310	SAMN03105564	GCA_000790185.1		JTTX00000000			6894960	65.79	6355
287.1068	WGS	AZPAE14864		25367914	PRJNA264310	SAMN03105563	GCA_000790155.1		JTTY00000000			6160523	66.57	5726
287.1069	WGS	AZPAE14863		25367914	PRJNA264310	SAMN03105562	GCA_000790145.1		JTTZ00000000			7070053	65.55	6489
287.1070	WGS	AZPAE14862		25367914	PRJNA264310	SAMN03105561	GCA_000790105.1		JTUA00000000			7067572	65.64	6515
287.1071	WGS	AZPAE14861		25367914	PRJNA264310	SAMN03105560	GCA_000790085.1		JTUB00000000			6713012	66.14	6305
287.1072	WGS	AZPAE14860		25367914	PRJNA264310	SAMN03105559	GCA_000790065.1		JTUC00000000			6768731	66.15	6354
287.1073	WGS	AZPAE14859		25367914	PRJNA264310	SAMN03105558	GCA_000790035.1		JTUD00000000			6527863	66.22	6043
287.1074	WGS	AZPAE14858		25367914	PRJNA264310	SAMN03105557	GCA_000790025.1		JTUE00000000			6660551	65.95	6247
287.1075	WGS	AZPAE14857		25367914	PRJNA264310	SAMN03105556	GCA_000789995.1		JTUF00000000			6869309	66.04	6466
287.1076	WGS	AZPAE14856		25367914	PRJNA264310	SAMN03105555	GCA_000789965.1		JTUG00000000			6335571	66.42	5881
287.1077	WGS	AZPAE14855		25367914	PRJNA264310	SAMN03105554	GCA_000789925.1		JTUH00000000			6342011	66.15	5813
287.1078	WGS	AZPAE14853		25367914	PRJNA264310	SAMN03105553	GCA_000789905.1		JTUI00000000			6829167	66.09	6431
287.1079	WGS	AZPAE14852		25367914	PRJNA264310	SAMN03105552	GCA_000789845.1		JTUJ00000000			6860603	65.91	6385
287.1080	WGS	AZPAE14851		25367914	PRJNA264310	SAMN03105551	GCA_000789835.1		JTUK00000000			6617149	66.24	6209
287.1081	WGS	AZPAE14850		25367914	PRJNA264310	SAMN03105550	GCA_000789785.1		JTUL00000000			6729517	66.06	6250
287.1082	WGS	AZPAE14848		25367914	PRJNA264310	SAMN03105549	GCA_000789805.1		JTUM00000000			6252044	66.43	5800
287.1083	WGS	AZPAE14847		25367914	PRJNA264310	SAMN03105548	GCA_000789755.1		JTUN00000000			6345563	66.43	5908
287.1084	WGS	AZPAE14846		25367914	PRJNA264310	SAMN03105547	GCA_000789745.1		JTUO00000000			6819636	65.85	6392
287.1085	WGS	AZPAE14845		25367914	PRJNA264310	SAMN03105546	GCA_000789705.1		JTUP00000000			6621008	66	6165
287.1086	WGS	AZPAE14844		25367914	PRJNA264310	SAMN03105545	GCA_000789685.1		JTUQ00000000			6732772	66.12	6272
287.1087	WGS	AZPAE14843		25367914	PRJNA264310	SAMN03105544	GCA_000789635.1		JTUR00000000			6737478	65.98	6249
287.1088	WGS	AZPAE14842		25367914	PRJNA264310	SAMN03105543	GCA_000789625.1		JTUS00000000			6889407	65.93	6406
287.1089	WGS	AZPAE14841		25367914	PRJNA264310	SAMN03105542	GCA_000789605.1		JTUT00000000			6845205	66.01	6370
287.1090	WGS	AZPAE14840		25367914	PRJNA264310	SAMN03105541	GCA_000789555.1		JTUU00000000			7049244	65.61	6464
287.1091	WGS	AZPAE14839		25367914	PRJNA264310	SAMN03105540	GCA_000794365.1		JTUV00000000			6615080	66.18	6134
287.1092	WGS	AZPAE14838		25367914	PRJNA264310	SAMN03105539	GCA_000794335.1		JTUW00000000			7113432	65.42	6516
287.1093	WGS	AZPAE14837		25367914	PRJNA264310	SAMN03105538	GCA_000794325.1		JTUX00000000			6449289	66.22	5979
287.1094	WGS	AZPAE14836		25367914	PRJNA264310	SAMN03105537	GCA_000794305.1		JTUY00000000			6438844	66.27	5969
287.1095	WGS	AZPAE14835		25367914	PRJNA264310	SAMN03105536	GCA_000794285.1		JTUZ00000000			6500090	66.12	6016
287.1096	WGS	AZPAE14834		25367914	PRJNA264310	SAMN03105535	GCA_000794245.1		JTVA00000000			6792091	65.97	6325
287.1097	WGS	AZPAE14833		25367914	PRJNA264310	SAMN03105534	GCA_000794265.1		JTVB00000000			6876687	65.96	6423
287.1098	WGS	AZPAE14832		25367914	PRJNA264310	SAMN03105533	GCA_000794165.1		JTVC00000000			6543022	66.02	6046
287.1099	WGS	AZPAE14831		25367914	PRJNA264310	SAMN03105532	GCA_000794175.1		JTVD00000000			7184792	65.56	6690
287.1100	WGS	AZPAE14830		25367914	PRJNA264310	SAMN03105531	GCA_000794185.1		JTVE00000000			6816534	66	6336
287.1101	WGS	AZPAE14829		25367914	PRJNA264310	SAMN03105530	GCA_000794195.1		JTVF00000000			6995537	66.05	6562
287.1102	WGS	AZPAE14828		25367914	PRJNA264310	SAMN03105529	GCA_000795385.1		JTVG00000000			6872882	66.04	6438
287.1103	WGS	AZPAE14827		25367914	PRJNA264310	SAMN03105528	GCA_000795365.1		JTVH00000000			7354112	65.59	6740
287.1104	WGS	AZPAE14826		25367914	PRJNA264310	SAMN03105527	GCA_000795345.1		JTVI00000000			7108825	65.87	6643
287.1105	WGS	AZPAE14825		25367914	PRJNA264310	SAMN03105526	GCA_000795325.1		JTVJ00000000			6426191	66.4	5929
287.1106	WGS	AZPAE14824		25367914	PRJNA264310	SAMN03105525	GCA_000795305.1		JTVK00000000			7034546	65.84	6581
287.1107	WGS	AZPAE14823		25367914	PRJNA264310	SAMN03105524	GCA_000795285.1		JTVL00000000			6849147	66.04	6386
287.1108	WGS	AZPAE14822		25367914	PRJNA264310	SAMN03105523	GCA_000795265.1		JTVM00000000			6668034	66.1	6226
287.1109	WGS	AZPAE14821		25367914	PRJNA264310	SAMN03105522	GCA_000795235.1		JTVN00000000			6811510	66.04	6388
287.1110	WGS	AZPAE14820		25367914	PRJNA264310	SAMN03105521	GCA_000795225.1		JTVO00000000			6364162	66.41	5889
287.1111	WGS	AZPAE14819		25367914	PRJNA264310	SAMN03105520	GCA_000795205.1		JTVP00000000			6660543	66.16	6220
287.1112	WGS	AZPAE14818		25367914	PRJNA264310	SAMN03105519	GCA_000795185.1		JTVQ00000000			6303594	66.39	5841
287.1113	WGS	AZPAE14817		25367914	PRJNA264310	SAMN03105518	GCA_000795165.1		JTVR00000000			6295916	66.49	5897
287.1114	WGS	AZPAE14816		25367914	PRJNA264310	SAMN03105517	GCA_000795145.1		JTVS00000000			6738242	66.04	6258
287.1115	WGS	AZPAE14815		25367914	PRJNA264310	SAMN03105516	GCA_000795115.1		JTVT00000000			7030097	65.89	6610
287.1116	WGS	AZPAE14814		25367914	PRJNA264310	SAMN03105515	GCA_000795105.1		JTVU00000000			6843476	65.98	6409
287.1117	WGS	AZPAE14813		25367914	PRJNA264310	SAMN03105514	GCA_000795085.1		JTVV00000000			6470062	66.2	6024
287.1118	WGS	AZPAE14812		25367914	PRJNA264310	SAMN03105513	GCA_000795065.1		JTVW00000000			7093737	65.99	6695
287.1119	WGS	AZPAE14811		25367914	PRJNA264310	SAMN03105512	GCA_000795045.1		JTVX00000000			6981966	65.94	6498
287.1120	WGS	AZPAE14810		25367914	PRJNA264310	SAMN03105511	GCA_000795025.1		JTVY00000000			6316519	66.4	5892
287.1121	WGS	AZPAE14809		25367914	PRJNA264310	SAMN03105510	GCA_000794995.1		JTVZ00000000			6210274	66.51	5762
287.1122	WGS	AZPAE14732		25367914	PRJNA264310	SAMN03105509	GCA_000794985.1		JTWA00000000			6793558	66.06	6291
287.1123	WGS	AZPAE14731		25367914	PRJNA264310	SAMN03105508	GCA_000794965.1		JTWB00000000			6231966	66.5	5829
287.1124	WGS	AZPAE14730		25367914	PRJNA264310	SAMN03105507	GCA_000794945.1		JTWC00000000			6865760	66.02	6393
287.1125	WGS	AZPAE14729		25367914	PRJNA264310	SAMN03105506	GCA_000794925.1		JTWD00000000			7015575	65.78	6530
287.1126	WGS	AZPAE14728		25367914	PRJNA264310	SAMN03105505	GCA_000794905.1		JTWE00000000			7356424	65.59	6867
287.1127	WGS	AZPAE14727		25367914	PRJNA264310	SAMN03105504	GCA_000794885.1		JTWF00000000			7362494	65.57	6872
287.1128	WGS	AZPAE14726		25367914	PRJNA264310	SAMN03105503	GCA_000794865.1		JTWG00000000			6885273	65.84	6404
287.1129	WGS	AZPAE14725		25367914	PRJNA264310	SAMN03105502	GCA_000794845.1		JTWH00000000			6802459	66.14	6366
287.1130	WGS	AZPAE14724		25367914	PRJNA264310	SAMN03105501	GCA_000795865.1		JTWI00000000			7091089	65.79	6611
287.1131	WGS	AZPAE14723		25367914	PRJNA264310	SAMN03105500	GCA_000795705.1		JTWJ00000000			6639036	66.13	6159
287.1132	WGS	AZPAE14722		25367914	PRJNA264310	SAMN03105499	GCA_000796645.1		JTWK00000000			6781659	66.07	6364
287.1133	WGS	AZPAE14721		25367914	PRJNA264310	SAMN03105498	GCA_000796245.1		JTWL00000000			6867543	66.01	6376
287.1134	WGS	AZPAE14720		25367914	PRJNA264310	SAMN03105497	GCA_000795955.1		JTWM00000000			6813733	66.02	6330
287.1135	WGS	AZPAE14719		25367914	PRJNA264310	SAMN03105496	GCA_000797025.1		JTWN00000000			6855346	66	6365
287.1136	WGS	AZPAE14718		25367914	PRJNA264310	SAMN03105495	GCA_000795905.1		JTWO00000000			6910404	65.98	6451
287.1137	WGS	AZPAE14717		25367914	PRJNA264310	SAMN03105494	GCA_000796605.1		JTWP00000000			7039359	65.87	6564
287.1138	WGS	AZPAE14716		25367914	PRJNA264310	SAMN03105493	GCA_000795535.1		JTWQ00000000			7038646	65.93	6640
287.1139	WGS	AZPAE14715		25367914	PRJNA264310	SAMN03105492	GCA_000796725.1		JTWR00000000			7119339	65.79	6554
287.1140	WGS	AZPAE14714		25367914	PRJNA264310	SAMN03105491	GCA_000796845.1		JTWS00000000			7022276	65.78	6540
287.1141	WGS	AZPAE14713		25367914	PRJNA264310	SAMN03105490	GCA_000797085.1		JTWT00000000			7238306	65.6	6736
287.1142	WGS	AZPAE14712		25367914	PRJNA264310	SAMN03105489	GCA_000797205.1		JTWU00000000			7010520	65.95	6603
287.1143	WGS	AZPAE14711		25367914	PRJNA264310	SAMN03105488	GCA_000797345.1		JTWV00000000			7121620	65.79	6548
287.1144	WGS	AZPAE14710		25367914	PRJNA264310	SAMN03105487	GCA_000795605.1		JTWW00000000			6748304	66.14	6241
287.1145	WGS	AZPAE14708		25367914	PRJNA264310	SAMN03105486	GCA_000795815.1		JTWX00000000			6707536	66.05	6310
287.1146	WGS	AZPAE14707		25367914	PRJNA264310	SAMN03105485	GCA_000796025.1		JTWY00000000			7081209	65.78	6604
287.1147	WGS	AZPAE14706		25367914	PRJNA264310	SAMN03105484	GCA_000796165.1		JTWZ00000000			6921381	66.06	6483
287.1148	WGS	AZPAE14705		25367914	PRJNA264310	SAMN03105483	GCA_000795805.1		JTXA00000000			6888268	65.97	6439
287.1149	WGS	AZPAE14704		25367914	PRJNA264310	SAMN03105482	GCA_000794825.1		JTXB00000000			6282527	66.51	5853
287.1150	WGS	AZPAE14703		25367914	PRJNA264310	SAMN03105481	GCA_000794805.1		JTXC00000000			6892377	65.93	6421
287.1151	WGS	AZPAE14702		25367914	PRJNA264310	SAMN03105480	GCA_000794785.1		JTXD00000000			7131510	65.84	6679
287.1152	WGS	AZPAE14701		25367914	PRJNA264310	SAMN03105479	GCA_000794745.1		JTXE00000000			6990663	65.93	6613
287.1153	WGS	AZPAE14700		25367914	PRJNA264310	SAMN03105478	GCA_000794735.1		JTXF00000000			6754658	66.09	6251
287.1154	WGS	AZPAE14699		25367914	PRJNA264310	SAMN03105477	GCA_000794725.1		JTXG00000000			5743255	65.28	5427
287.1155	WGS	AZPAE14698		25367914	PRJNA264310	SAMN03105476	GCA_000794705.1		JTXH00000000			6467367	65.44	6034
287.1156	WGS	AZPAE14697		25367914	PRJNA264310	SAMN03105475	GCA_000794675.1		JTXI00000000			6531914	66.18	6070
287.1157	WGS	AZPAE14695		25367914	PRJNA264310	SAMN03105474	GCA_000794665.1		JTXJ00000000			6757024	66.06	6291
287.1158	WGS	AZPAE14694		25367914	PRJNA264310	SAMN03105473	GCA_000794645.1		JTXK00000000			6964286	65.86	6511
287.1159	WGS	AZPAE14693		25367914	PRJNA264310	SAMN03105472	GCA_000794625.1		JTXL00000000			6380431	66.44	5949
287.1160	WGS	AZPAE14692		25367914	PRJNA264310	SAMN03105471	GCA_000794585.1		JTXM00000000			7011166	65.9	6516
287.1161	WGS	AZPAE14691		25367914	PRJNA264310	SAMN03105470	GCA_000794605.1		JTXN00000000			6301926	66.57	5846
287.1162	WGS	AZPAE14690		25367914	PRJNA264310	SAMN03105469	GCA_000794555.1		JTXO00000000			6730564	66.1	6211
287.1163	WGS	AZPAE14689		25367914	PRJNA264310	SAMN03105468	GCA_000794545.1		JTXP00000000			7252889	65.55	6684
287.1164	WGS	AZPAE14688		25367914	PRJNA264310	SAMN03105467	GCA_000794505.1		JTXQ00000000			7007711	66.04	6595
287.1165	WGS	AZPAE14687		25367914	PRJNA264310	SAMN03105466	GCA_000794515.1		JTXR00000000			6995963	65.89	6510
287.1166	WGS	AZPAE14570		25367914	PRJNA264310	SAMN03105465	GCA_000794455.1		JTXS00000000			7094694	65.94	6718
287.1167	WGS	AZPAE14566		25367914	PRJNA264310	SAMN03105464	GCA_000794485.1		JTXT00000000			6870259	65.99	6333
287.1168	WGS	AZPAE14557		25367914	PRJNA264310	SAMN03105463	GCA_000794445.1		JTXU00000000			6772788	66.1	6299
287.1169	WGS	AZPAE14554		25367914	PRJNA264310	SAMN03105462	GCA_000794405.1		JTXV00000000			7101679	65.75	6615
287.1170	WGS	AZPAE14550		25367914	PRJNA264310	SAMN03105461	GCA_000794425.1		JTXW00000000			6317165	66.47	5871
287.1171	WGS	AZPAE14538		25367914	PRJNA264310	SAMN03105460	GCA_000796505.1		JTXX00000000			6267671	66.54	5815
287.1172	WGS	AZPAE14535		25367914	PRJNA264310	SAMN03105459	GCA_000796475.1		JTXY00000000			6944986	65.88	6487
287.1173	WGS	AZPAE14533		25367914	PRJNA264310	SAMN03105458	GCA_000796465.1		JTXZ00000000			6661879	66.27	6221
287.1174	WGS	AZPAE14526		25367914	PRJNA264310	SAMN03105457	GCA_000796445.1		JTYA00000000			6289098	66.55	5848
287.1175	WGS	AZPAE14509		25367914	PRJNA264310	SAMN03105456	GCA_000796425.1		JTYB00000000			6519283	66.29	6074
287.1176	WGS	AZPAE14505		25367914	PRJNA264310	SAMN03105455	GCA_000796405.1		JTYC00000000			6823044	66.04	6345
287.1177	WGS	AZPAE14499		25367914	PRJNA264310	SAMN03105454	GCA_000796385.1		JTYD00000000			6698732	66.12	6316
287.1178	WGS	AZPAE14463		25367914	PRJNA264310	SAMN03105453	GCA_000796365.1		JTYE00000000			7034157	65.85	6558
287.1179	WGS	AZPAE14453		25367914	PRJNA264310	SAMN03105452	GCA_000796345.1		JTYF00000000			7052856	65.76	6560
287.1180	WGS	AZPAE14443		25367914	PRJNA264310	SAMN03105451	GCA_000796325.1		JTYG00000000			6268752	66.59	5823
287.1181	WGS	AZPAE14442		25367914	PRJNA264310	SAMN03105450	GCA_000796295.1		JTYH00000000			7007955	65.97	6557
287.1182	WGS	AZPAE14441		25367914	PRJNA264310	SAMN03105449	GCA_000796285.1		JTYI00000000			6810460	65.93	6337
287.1183	WGS	AZPAE14437		25367914	PRJNA264310	SAMN03105448	GCA_000796255.1		JTYJ00000000			6714753	66.04	6285
287.1184	WGS	AZPAE14422		25367914	PRJNA264310	SAMN03105447	GCA_000796225.1		JTYK00000000			6732223	66.05	6258
287.1185	WGS	AZPAE14415		25367914	PRJNA264310	SAMN03105446	GCA_000796205.1		JTYL00000000			6982687	65.83	6535
287.1186	WGS	AZPAE14410		25367914	PRJNA264310	SAMN03105445	GCA_000796175.1		JTYM00000000			6295059	66.5	5872
287.1187	WGS	AZPAE14404		25367914	PRJNA264310	SAMN03105444	GCA_000796145.1		JTYN00000000			6575587	66.3	6211
287.1188	WGS	AZPAE14403		25367914	PRJNA264310	SAMN03105443	GCA_000796125.1		JTYO00000000			6907387	66.08	6479
287.1189	WGS	AZPAE14402		25367914	PRJNA264310	SAMN03105442	GCA_000796085.1		JTYP00000000			6466306	66.33	6011
287.1190	WGS	AZPAE14398		25367914	PRJNA264310	SAMN03105441	GCA_000796095.1		JTYQ00000000			6693786	66.09	6246
287.1191	WGS	AZPAE14395		25367914	PRJNA264310	SAMN03105440	GCA_000796065.1		JTYR00000000			6325978	66.49	5908
287.1192	WGS	AZPAE14394		25367914	PRJNA264310	SAMN03105439	GCA_000796045.1		JTYS00000000			6977785	66.01	6525
287.1193	WGS	AZPAE14393		25367914	PRJNA264310	SAMN03105438	GCA_000796005.1		JTYT00000000			6723039	66.23	6312
287.1194	WGS	AZPAE14390		25367914	PRJNA264310	SAMN03105437	GCA_000795985.1		JTYU00000000			6884000	65.97	6434
287.1195	WGS	AZPAE14381		25367914	PRJNA264310	SAMN03105436	GCA_000795945.1		JTYV00000000			6791911	65.83	6312
287.1196	WGS	AZPAE14379		25367914	PRJNA264310	SAMN03105435	GCA_000795925.1		JTYW00000000			6253630	66.51	5835
287.1197	WGS	AZPAE14373		25367914	PRJNA264310	SAMN03105434	GCA_000795875.1		JTYX00000000			6337010	66.43	5854
287.1198	WGS	AZPAE14372		25367914	PRJNA264310	SAMN03105433	GCA_000795845.1		JTYY00000000			6794294	66.13	6350
287.1199	WGS	AZPAE14359		25367914	PRJNA264310	SAMN03105432	GCA_000795785.1		JTYZ00000000			6642619	66.29	6233
287.1200	WGS	AZPAE14353		25367914	PRJNA264310	SAMN03105431	GCA_000795765.1		JTZA00000000			6835254	66.01	6364
287.1201	WGS	AZPAE14352		25367914	PRJNA264310	SAMN03105430	GCA_000795735.1		JTZB00000000			6561378	66	6065
287.1202	WGS	AZPAE13880		25367914	PRJNA264310	SAMN03105429	GCA_000795725.1		JTZC00000000			6855952	66	6427
287.1203	WGS	AZPAE13879		25367914	PRJNA264310	SAMN03105428	GCA_000795685.1		JTZD00000000			6948193	65.92	6493
287.1204	WGS	AZPAE13877		25367914	PRJNA264310	SAMN03105427	GCA_000795665.1		JTZE00000000			6788523	66.1	6312
287.1205	WGS	AZPAE13876		25367914	PRJNA264310	SAMN03105426	GCA_000795635.1		JTZF00000000			6795623	65.85	6372
287.1206	WGS	AZPAE13872		25367914	PRJNA264310	SAMN03105425	GCA_000795625.1		JTZG00000000			6958295	65.9	6485
287.1207	WGS	AZPAE13866		25367914	PRJNA264310	SAMN03105424	GCA_000795585.1		JTZH00000000			7258328	65.73	6799
287.1208	WGS	AZPAE13864		25367914	PRJNA264310	SAMN03105423	GCA_000795565.1		JTZI00000000			6909435	65.95	6463
287.1209	WGS	AZPAE13860		25367914	PRJNA264310	SAMN03105422	GCA_000795525.1		JTZJ00000000			6888735	65.91	6446
287.1210	WGS	AZPAE13858		25367914	PRJNA264310	SAMN03105421	GCA_000795505.1		JTZK00000000			7017824	66.02	6594
287.1211	WGS	AZPAE13856		25367914	PRJNA264310	SAMN03105420	GCA_000795485.1		JTZL00000000			7373661	65.7	6958
287.1212	WGS	AZPAE13853		25367914	PRJNA264310	SAMN03105419	GCA_000795465.1		JTZM00000000			7040099	65.99	6608
287.1213	WGS	AZPAE13850		25367914	PRJNA264310	SAMN03105418	GCA_000795435.1		JTZN00000000			5501656	65.73	5089
287.1214	WGS	AZPAE13848		25367914	PRJNA264310	SAMN03105417	GCA_000795425.1		JTZO00000000			6958460	66.07	6522
287.1215	WGS	AZPAE13757		25367914	PRJNA264310	SAMN03105416	GCA_000795405.1		JTZP00000000			6469470	66.38	6110
287.1216	WGS	AZPAE13756		25367914	PRJNA264310	SAMN03105415	GCA_000797395.1		JTZQ00000000			7335469	65.54	6827
287.1217	WGS	AZPAE12423		25367914	PRJNA264310	SAMN03105414	GCA_000797355.1		JTZR00000000			6535360	66.21	6112
287.1218	WGS	AZPAE12422		25367914	PRJNA264310	SAMN03105413	GCA_000797325.1		JTZS00000000			6331130	66.45	5991
287.1219	WGS	AZPAE12421		25367914	PRJNA264310	SAMN03105412	GCA_000797305.1		JTZT00000000			6243887	66.4	5803
287.1220	WGS	AZPAE12420		25367914	PRJNA264310	SAMN03105411	GCA_000797285.1		JTZU00000000			6283659	66.37	5874
287.1221	WGS	AZPAE12419		25367914	PRJNA264310	SAMN03105410	GCA_000797265.1		JTZV00000000			6290772	66.46	5852
287.1222	WGS	AZPAE12418		25367914	PRJNA264310	SAMN03105409	GCA_000797245.1		JTZW00000000			6737495	66.21	6295
287.1223	WGS	AZPAE12417		25367914	PRJNA264310	SAMN03105408	GCA_000797225.1		JTZX00000000			6360200	66.3	5953
287.1224	WGS	AZPAE12416		25367914	PRJNA264310	SAMN03105407	GCA_000797185.1		JTZY00000000			6527924	66.15	6079
287.1225	WGS	AZPAE12415		25367914	PRJNA264310	SAMN03105406	GCA_000797165.1		JTZZ00000000			6740389	66.26	6356
287.1226	WGS	AZPAE12414		25367914	PRJNA264310	SAMN03105405	GCA_000797145.1		JUAA00000000			6736819	66.28	6337
287.1227	WGS	AZPAE12413		25367914	PRJNA264310	SAMN03105404	GCA_000797125.1		JUAB00000000			6742361	66.26	6359
287.1228	WGS	AZPAE12412		25367914	PRJNA264310	SAMN03105403	GCA_000797105.1		JUAC00000000			6445104	66.39	5958
287.1229	WGS	AZPAE12411		25367914	PRJNA264310	SAMN03105402	GCA_000797055.1		JUAD00000000			6341911	66.42	5921
287.1230	WGS	AZPAE12410		25367914	PRJNA264310	SAMN03105401	GCA_000797045.1		JUAE00000000			6457280	66.37	6046
287.1231	WGS	AZPAE12409		25367914	PRJNA264310	SAMN03105400	GCA_000797005.1		JUAF00000000			6758579	65.98	6261
287.1232	WGS	AZPAE12156		25367914	PRJNA264310	SAMN03105399	GCA_000796985.1		JUAG00000000			6571733	66.05	6140
287.1233	WGS	AZPAE12155		25367914	PRJNA264310	SAMN03105398	GCA_000796955.1		JUAH00000000			6732273	66.12	6311
287.1234	WGS	AZPAE12154		25367914	PRJNA264310	SAMN03105397	GCA_000796945.1		JUAI00000000			6299347	66.38	5838
287.1235	WGS	AZPAE12153		25367914	PRJNA264310	SAMN03105396	GCA_000796925.1		JUAJ00000000			6193644	66.55	5764
287.1237	WGS	AZPAE12151		25367914	PRJNA264310	SAMN03105394	GCA_000796875.1		JUAL00000000			6332026	66.47	5910
287.1238	WGS	AZPAE12150		25367914	PRJNA264310	SAMN03105393	GCA_000796865.1		JUAM00000000			6594453	65.98	6120
287.1239	WGS	AZPAE12149		25367914	PRJNA264310	SAMN03105392	GCA_000796785.1		JUAN00000000			6355203	66.36	5933
287.1240	WGS	AZPAE12148		25367914	PRJNA264310	SAMN03105391	GCA_000796825.1		JUAO00000000			6650984	66.28	6206
287.1241	WGS	AZPAE12147		25367914	PRJNA264310	SAMN03105390	GCA_000796795.1		JUAP00000000			6522044	66.25	6115
287.1242	WGS	AZPAE12146		25367914	PRJNA264310	SAMN03105389	GCA_000796765.1		JUAQ00000000			6313502	66.44	5855
287.1243	WGS	AZPAE12145		25367914	PRJNA264310	SAMN03105388	GCA_000796745.1		JUAR00000000			6452923	66.4	6019
287.1245	WGS	AZPAE12143		25367914	PRJNA264310	SAMN03105386	GCA_000796685.1		JUAT00000000			6473536	66.34	6066
287.1246	WGS	AZPAE12142		25367914	PRJNA264310	SAMN03105385	GCA_000796655.1		JUAU00000000			6323807	66.42	5907
287.1247	WGS	AZPAE12140		25367914	PRJNA264310	SAMN03105384	GCA_000796615.1		JUAV00000000			6250380	66.55	5810
287.1248	WGS	AZPAE12138		25367914	PRJNA264310	SAMN03105383	GCA_000796525.1		JUAW00000000			6576673	66.14	6209
287.1249	WGS	AZPAE12137		25367914	PRJNA264310	SAMN03105382	GCA_000796585.1		JUAX00000000			6304247	66.52	5862
287.1250	WGS	AZPAE12136		25367914	PRJNA264310	SAMN03105381	GCA_000796555.1		JUAY00000000			6303512	66.43	5780
287.1301	WGS	AZPAE12135		25367914	PRJNA264310	SAMN03105380	GCA_000796545.1		JUAZ00000000			6826162	66.07	6419
287.1477	WGS	MRSN 20176			PRJNA273956	SAMN03316892	GCF_000937465.2		JYGC02000000			6730817	65.93	6557
287.1482	WGS	MRSN18971			PRJNA240151	SAMN02673308	GCF_000710625.1		JFJU01000000			6391538	66.45	6020
287.2972	WGS	AR_0103			PRJNA292904	SAMN04014944	GCF_001874795.1		MPBP00000000			6900175	65.99	6559
287.2973	Complete	AR_0092			PRJNA292904	SAMN04014933	GCF_001874805.1		MPBS00000000			6963676	66.02	6620
287.2975	WGS	AR_0100			PRJNA292904	SAMN04014941	GCF_001874975.1		MPBQ00000000			6929574	65.98	6678
287.2976	WGS	AR_0105			PRJNA292904	SAMN04014946	GCF_001874995.1		MPBO00000000			6425652	66.22	6077
287.2977	WGS	AR_0054			PRJNA292904	SAMN04014895	GCF_001875165.1		MPBV00000000			7267705	65.81	7044
287.2978	WGS	AR_0064			PRJNA292904	SAMN04014905	GCF_001875185.1		MPBU00000000			6827144	66.05	6529
287.2979	WGS	AR_0094			PRJNA292904	SAMN04014935	GCF_001875205.1		MPBR00000000			6882581	66.05	6487
287.2980	WGS	AR_0108			PRJNA292904	SAMN04014949	GCF_001875215.1		MPBN00000000			6971125	65.98	6616
287.5685	Complete	AR_0360			PRJNA316321	SAMN07291503	GCA_002968515.1		CP027165			6463575	66.4415	6076
287.5686	Complete	AR_0354			PRJNA316321	SAMN07291497	GCA_002968585.1		CP027171			6747010	66.0972	6355
287.5687	Complete	AR_0353			PRJNA316321	SAMN07291496	GCA_002968655.1		CP027172,CP027173			7282236	65.7048	7057
287.5688	Complete	AR_0230			PRJNA316321	SAMN04901620	GCA_002968695.1		CP027174,CP027175,CP027176			7086054	65.8783	6769
287.5689	Complete	AR_0356			PRJNA316321	SAMN07291499	GCA_002968755.1		CP027169,CP027168,CP027170,CP027167			7247865	65.5944	7175
287.5690	Complete	AR_0357			PRJNA316321	SAMN07291500	GCA_002968955.1		CP027166			7162784	65.7971	6875
287.5701	WGS	AR_0355			PRJNA316321	SAMN07291498	GCA_003000655.1		PSQQ01000000			7172470	65.8478	6981
287.5702	WGS	AR_0359			PRJNA316321	SAMN07291502	GCA_003000695.1		PSQS01000000			6940345	65.9152	6672
287.5703	WGS	AR_0358			PRJNA316321	SAMN07291501	GCA_003000755.1		PSQR01000000			7284124	65.7102	7143
287.5704	WGS	AR_0351			PRJNA316321	SAMN07291494	GCA_003000795.1		PSQP01000000			6611054	66.2496	6254
287.5746	Complete	AR_0443			PRJNA316321	SAMN07291536	GCA_003074115.1		CP029147			6776714	65.8363	6434
287.5747	Complete	AR_0440			PRJNA316321	SAMN07291533	GCA_003074095.1		CP029148			7167215	65.8489	7003
287.5748	Complete	AR439			PRJNA316321	SAMN07291532	GCA_003073895.1		CP029097,CP029095,CP029096			7578039	65.4188	7384
287.5749	Complete	AR442			PRJNA316321	SAMN07291535	GCA_003073795.1		CP029090			7267567	65.7523	7093
287.5750	Complete	AR445			PRJNA316321	SAMN07291538	GCA_003073735.1		CP029088			7125975	65.7844	6839
287.5751	Complete	AR441			PRJNA316321	SAMN07291534	GCA_003073695.1		CP029093,CP029091,CP029092,CP029094			7245771	65.5949	7220
287.5752	Complete	AR444			PRJNA316321	SAMN07291537	GCA_003073615.1		CP029089			6853499	66.0528	6469
287.5778	Complete	AR_0095			PRJNA292904	SAMN04014936	GCA_002997005.1		CP027538			6822666	66.1076	6518
287.5955	Complete	AR_0446			PRJNA316321	SAMN07291539	GCA_003193645.1		CP029660			6475581	66.3303	6189
287.5956	Complete	CCUG 70744			PRJNA401330	SAMN07602569	GCA_003194245.1		CP023255			6859232	66.0403	6683
287.5959	Complete	AR_0110			PRJNA292904	SAMN04014951	GCA_003204335.1		CP029745			6799785	66.0137	6549
287.5969	WGS	AR_0447			PRJNA316321	SAMN07291540	GCA_003260415.1		QHCK01000000			7178792	65.8669	6915
287.5971	Complete	AR_460			PRJNA316321	SAMN07291553	GCA_003288335.1		CP030351			6303875	66.5548	5931
287.5972	Complete	AR_455			PRJNA316321	SAMN07291548	GCA_003288355.1		CP030328			6540996	65.8842	6317
287.5973	Complete	AR_458			PRJNA316321	SAMN07291551	GCA_003288435.1		CP030327			6685102	66.2335	6334
287.6326	WGS	AR_0459			PRJNA316321	SAMN07291552	GCA_003324255.1		QMGQ01000000			6752712	66.2461	6430
287.6327	WGS	AR_0457			PRJNA316321	SAMN07291550	GCA_003324275.1		QMGP01000000			7381251	65.6385	7222
287.6328	WGS	AR_0456			PRJNA316321	SAMN07291549	GCA_003324295.1		QMGO01000000			7079305	65.8572	6843
287.6329	WGS	AR_0449			PRJNA316321	SAMN07291542	GCA_003324385.1		QMGL01000000			6792240	65.9625	6645
287.6330	WGS	AR_0241			PRJNA316321	SAMN04901631	GCA_003324405.1		QMGI01000000			7226502	65.649	6943
287.6331	WGS	AR_0352			PRJNA316321	SAMN07291495	GCA_003324465.1		QMGJ01000000			6418505	66.4313	6006
287.6492	Complete	AR_0111			PRJNA292904	SAMN04014952	GCA_003571805.1		CP032257,CP032256			7075653	65.8305	6880
287.7771	WGS	MRSN8914			PRJNA446057	SAMN09788319			RXTB01000000			7356800	65.3397	7463
287.7772	WGS	MRSN8915			PRJNA446057	SAMN09788318			RXTA01000000			7064713	65.6805	7110
287.7773	WGS	MRSN994			PRJNA446057	SAMN09788315			RXSX01000000			6734108	66.1246	6568
287.7774	WGS	MRSN8139			PRJNA446057	SAMN09788322			RXTE01000000			6575059	66.3682	6439
287.7775	WGS	MRSN7014			PRJNA446057	SAMN09788325			RXTH01000000			6420453	66.4322	6152
287.7776	WGS	MRSN8912			PRJNA446057	SAMN09788320			RXTC01000000			6986301	65.7187	6959
287.7777	WGS	MRSN8136			PRJNA446057	SAMN09788323			RXTF01000000			6907900	65.7138	6837
287.7778	WGS	MRSN6695			PRJNA446057	SAMN09788327			RXTJ01000000			6235816	66.5763	5957
287.7779	WGS	MRSN6241			PRJNA446057	SAMN09788329			RXTL01000000			7161217	65.6252	7168
287.7780	WGS	MRSN6678			PRJNA446057	SAMN09788328			RXTK01000000			6782774	66.1196	6620
287.7781	WGS	MRSN6220			PRJNA446057	SAMN09788330			RXTM01000000			6910198	66.0095	7102
287.7782	WGS	MRSN5524			PRJNA446057	SAMN09788332			RXTO01000000			6725073	65.9956	6589
287.7783	WGS	MRSN5539			PRJNA446057	SAMN09788331			RXTN01000000			6769662	66.0706	6626
287.7784	WGS	MRSN552			PRJNA446057	SAMN09788333			RXTP01000000			6444919	66.355	6239
287.7785	WGS	MRSN5519			PRJNA446057	SAMN09788334			RXTQ01000000			6751302	66.1351	6581
287.7786	WGS	MRSN4841			PRJNA446057	SAMN09788337			RXTT01000000			6475204	66.2528	6275
287.7787	WGS	MRSN5498			PRJNA446057	SAMN09788336			RXTS01000000			6821230	66.0002	6688
287.7788	WGS	MRSN443463			PRJNA446057	SAMN09788338			RXTU01000000			6393241	66.4404	6203
287.7789	WGS	MRSN315			PRJNA446057	SAMN09788352			RXUI01000000			6696919	66.2052	6565
287.7790	WGS	MRSN19711			PRJNA446057	SAMN09788366			RXUX01000000			6265327	66.5761	6041
287.7791	WGS	MRSN20190			PRJNA446057	SAMN09788365			RXUV01000000			6191883	66.5932	6033
287.7792	WGS	MRSN9873			PRJNA446057	SAMN09788316			RXSY01000000			7146707	65.4882	7119
287.7793	WGS	MRSN9718			PRJNA446057	SAMN09788317			RXSZ01000000			6861353	66.0195	6840
287.7794	WGS	MRSN8141			PRJNA446057	SAMN09788321			RXTD01000000			7161718	65.6272	7174
287.7795	WGS	MRSN8130			PRJNA446057	SAMN09788324			RXTG01000000			6828028	66.0956	6736
287.7796	WGS	MRSN6739			PRJNA446057	SAMN09788326			RXTI01000000			6298064	66.4781	6007
287.7797	WGS	MRSN5508			PRJNA446057	SAMN09788335			RXTR01000000			6439859	66.3468	6348
287.7798	WGS	MRSN435288			PRJNA446057	SAMN09788340			RXTW01000000			6363888	66.2248	6241
287.7799	WGS	MRSN321			PRJNA446057	SAMN09788350			RXUG01000000			6260875	66.5478	5979
287.7800	WGS	MRSN25678			PRJNA446057	SAMN09788357			RXUN01000000			6509751	66.2153	6476
287.7801	WGS	MRSN18754			PRJNA446057	SAMN09788375			RXVH01000000			6270751	66.5415	6031
287.7802	WGS	MRSN390231			PRJNA446057	SAMN09788343			RXTZ01000000			6149846	66.3774	5888
287.7803	WGS	MRSN436311			PRJNA446057	SAMN09788339			RXTV01000000			6473360	66.416	6176
287.7804	WGS	MRSN373401			PRJNA446057	SAMN09788344			RXUA01000000			6985982	65.9715	6797
287.7805	WGS	MRSN3705			PRJNA446057	SAMN09788345			RXUB01000000			6419743	66.5763	6350
287.7806	WGS	MRSN29192			PRJNA446057	SAMN09788354			RXUK01000000			6375161	66.4394	6112
287.7807	WGS	MRSN25762			PRJNA446057	SAMN09788356			RXUM01000000			6845305	66.2181	6676
287.7808	WGS	MRSN2444			PRJNA446057	SAMN09788359			RXUP01000000			6843047	66.0667	6830
287.7809	WGS	MRSN3587			PRJNA446057	SAMN09788364			RXUU01000000			6494873	66.3672	6371
287.7810	WGS	MRSN2101			PRJNA446057	SAMN09788363			RXUT01000000			6346725	66.3766	6176
287.7811	WGS	MRSN23861			PRJNA446057	SAMN09788360			RXUQ01000000			7025487	65.9426	7002
287.7812	WGS	MRSN20176			PRJNA446057	SAMN09788414			RXUW01000000			6717057	65.9965	6757
287.7813	WGS	MRSN1948			PRJNA446057	SAMN09788367			RXUY01000000			6674435	66.1956	6629
287.7814	WGS	MRSN1906			PRJNA446057	SAMN09788370			RXVB01000000			7049219	65.7835	6945
287.7815	WGS	MRSN1938			PRJNA446057	SAMN09788368			RXUZ01000000			7052906	66.1162	7075
287.7816	WGS	MRSN1899			PRJNA446057	SAMN09788372			RXVD01000000			6573139	66.2204	6380
287.7817	WGS	MRSN1902			PRJNA446057	SAMN09788371			RXVC01000000			6344431	66.4572	6111
287.7818	WGS	MRSN18970			PRJNA446057	SAMN09788413			RXVE01000000			6370604	66.5119	6124
287.7819	WGS	MRSN17849			PRJNA446057	SAMN09788378			RXVK01000000			6738933	66.1247	6645
287.7820	WGS	MRSN16744			PRJNA446057	SAMN09788382			RXVO01000000			6776946	66.1175	6602
287.7821	WGS	MRSN16740			PRJNA446057	SAMN09788383			RXVP01000000			6670940	66.0802	6532
287.7822	WGS	MRSN1688			PRJNA446057	SAMN09788380			RXVM01000000			6606996	66.1484	6454
287.7823	WGS	MRSN16383			PRJNA446057	SAMN09788384			RXVQ01000000			6302224	66.5333	6036
287.7824	WGS	MRSN16345			PRJNA446057	SAMN09788385			RXVR01000000			6333273	66.5116	6146
287.7825	WGS	MRSN1613			PRJNA446057	SAMN09788388			RXVU01000000			6276349	66.5101	5973
287.7826	WGS	MRSN1601			PRJNA446057	SAMN09788390			RXVW01000000			6411494	66.284	6295
287.7827	WGS	MRSN1583			PRJNA446057	SAMN09788391			RXVX01000000			6463376	66.3704	6287
287.7828	WGS	MRSN1617			PRJNA446057	SAMN09788387			RXVT01000000			6780137	66.1964	6685
287.7829	WGS	MRSN1388			PRJNA446057	SAMN09788396			RXWC01000000			7171428	65.8624	7104
287.7830	WGS	MRSN15678			PRJNA446057	SAMN09788393			RXVZ01000000			6780257	66.0946	6651
287.7831	WGS	MRSN14981			PRJNA446057	SAMN09788395			RXWB01000000			6508561	66.2167	6412
287.7832	WGS	MRSN409937			PRJNA446057	SAMN09788341			RXTX01000000			6487691	66.3382	6283
287.7833	WGS	MRSN351791			PRJNA446057	SAMN09788348			RXUE01000000			6812488	65.9388	6708
287.7834	WGS	MRSN346179			PRJNA446057	SAMN09788349			RXUF01000000			6293739	66.5171	6009
287.7835	WGS	MRSN30858			PRJNA446057	SAMN09788353			RXUJ01000000			6382502	66.4238	6222
287.7836	WGS	MRSN26263			PRJNA446057	SAMN09788355			RXUL01000000			6430277	66.3206	6314
287.7837	WGS	MRSN1925			PRJNA446057	SAMN09788369			RXVA01000000			7130564	65.8321	7002
287.7838	WGS	MRSN25623			PRJNA446057	SAMN09788358			RXUO01000000			6635285	66.0865	6504
287.7839	WGS	MRSN18562			PRJNA446057	SAMN09788376			RXVI01000000			6494310	66.3681	6242
287.7840	WGS	MRSN16344			PRJNA446057	SAMN09788386			RXVS01000000			6318735	66.4573	6176
287.7841	WGS	MRSN1612			PRJNA446057	SAMN09788389			RXVV01000000			6506983	66.235	6323
287.7842	WGS	MRSN1739			PRJNA446057	SAMN09788379			RXVL01000000			7031489	65.8243	6954
287.7843	WGS	MRSN16847			PRJNA446057	SAMN09788381			RXVN01000000			6594082	65.9787	6506
287.7844	WGS	MRSN15753			PRJNA446057	SAMN09788392			RXVY01000000			6547438	66.1835	6436
287.7845	WGS	MRSN1380			PRJNA446057	SAMN09788397			RXWD01000000			6339603	66.4898	6114
287.7846	WGS	MRSN15566			PRJNA446057	SAMN09788394			RXWA01000000			6408848	66.39	6213
287.7847	WGS	MRSN1356			PRJNA446057	SAMN09788398			RXWE01000000			6555630	66.1988	6420
287.7848	WGS	MRSN12914			PRJNA446057	SAMN09788401			RXWH01000000			6756810	65.9238	6628
287.7849	WGS	MRSN12283			PRJNA446057	SAMN09788404			RXWK01000000			6301640	66.4996	6026
287.7850	WGS	MRSN12365			PRJNA446057	SAMN09788403			RXWJ01000000			6869499	65.8729	6822
287.7851	WGS	MRSN358800			PRJNA446057	SAMN09788347			RXUD01000000			6501460	66.3577	6360
287.7852	WGS	MRSN11538			PRJNA446057	SAMN09788407			RXWN01000000			6528585	66.2616	6444
287.7853	WGS	MRSN11278			PRJNA446057	SAMN09788412			RXWS01000000			6893110	66.0431	6825
287.7854	WGS	MRSN11281			PRJNA446057	SAMN09788411			RXWR01000000			6323478	66.4925	6072
287.7855	WGS	MRSN13488			PRJNA446057	SAMN09788399			RXWF01000000			5912421	66.5029	5623
287.7856	WGS	MRSN1344			PRJNA446057	SAMN09788400			RXWG01000000			6232278	66.4945	6051
287.7857	WGS	MRSN12368			PRJNA446057	SAMN09788402			RXWI01000000			6340159	66.4363	6177
287.7858	WGS	MRSN11285			PRJNA446057	SAMN09788410			RXWQ01000000			6650291	66.1636	6494
287.7859	WGS	MRSN12282			PRJNA446057	SAMN09788405			RXWL01000000			6876949	65.9685	6923
287.7860	WGS	MRSN11536			PRJNA446057	SAMN09788408			RXWO01000000			6935556	65.9166	6876
287.7861	WGS	MRSN11286			PRJNA446057	SAMN09788409			RXWP01000000			6711313	65.9116	6631
287.7862	WGS	MRSN11976			PRJNA446057	SAMN09788406			RXWM01000000			6991711	65.9008	6936
287.8027	WGS	MRSN401528			PRJNA446057	SAMN09788342			RXTY01000000			6486368	66.1404	6412
287.8028	WGS	MRSN369569			PRJNA446057	SAMN09788346			RXUC01000000			6316238	66.5186	6127
287.8029	WGS	MRSN2144			PRJNA446057	SAMN09788361			RXUR01000000			7032738	65.7908	6920
287.8030	WGS	MRSN18855			PRJNA446057	SAMN09788373			RXVF01000000			6296953	66.4896	6118
287.8031	WGS	MRSN2108			PRJNA446057	SAMN09788362			RXUS01000000			6394452	66.3973	6183
287.8032	WGS	MRSN18803			PRJNA446057	SAMN09788374			RXVG01000000			6191380	66.5096	5997
287.8033	WGS	MRSN317			PRJNA446057	SAMN09788351			RXUH01000000			6349621	66.4736	6127
287.8034	WGS	MRSN18560			PRJNA446057	SAMN09788377			RXVJ01000000			6268481	66.5069	6003
287.846	WGS	AZPAE15072		25367914	PRJNA264310	SAMN03105769	GCA_000793385.1		JTMA00000000			6437786	66.3	5988
287.847	WGS	AZPAE15071		25367914	PRJNA264310	SAMN03105768	GCA_000793505.1		JTMB00000000			7403124	65.72	6904
287.848	WGS	AZPAE15070		25367914	PRJNA264310	SAMN03105767	GCA_000793485.1		JTMC00000000			7164330	65.83	6731
287.849	WGS	AZPAE15069		25367914	PRJNA264310	SAMN03105766	GCA_000793455.1		JTMD00000000			6980745	65.93	6451
287.850	WGS	AZPAE15068		25367914	PRJNA264310	SAMN03105765	GCA_000793445.1		JTME00000000			6856096	66.14	6393
287.851	WGS	AZPAE15067		25367914	PRJNA264310	SAMN03105764	GCA_000793415.1		JTMF00000000			6651822	66.15	6191
287.852	WGS	AZPAE15066		25367914	PRJNA264310	SAMN03105763	GCA_000793395.1		JTMG00000000			6959180	65.82	6446
287.853	WGS	AZPAE15065		25367914	PRJNA264310	SAMN03105762	GCA_000793365.1		JTMH00000000			6184461	66.47	5748
287.854	WGS	AZPAE15064		25367914	PRJNA264310	SAMN03105761	GCA_000793345.1		JTMI00000000			6687065	66.19	6226
287.855	WGS	AZPAE15063		25367914	PRJNA264310	SAMN03105760	GCA_000793315.1		JTMJ00000000			6768150	66.03	6303
287.856	WGS	AZPAE15062		25367914	PRJNA264310	SAMN03105759	GCA_000793285.1		JTMK00000000			6481258	66.31	6037
287.857	WGS	AZPAE15061		25367914	PRJNA264310	SAMN03105758	GCA_000793295.1		JTML00000000			6832661	65.96	6355
287.858	WGS	AZPAE15060		25367914	PRJNA264310	SAMN03105757	GCA_000793255.1		JTMM00000000			6716256	66.11	6268
287.859	WGS	AZPAE15059		25367914	PRJNA264310	SAMN03105756	GCA_000793245.1		JTMN00000000			6657813	66.25	6251
287.860	WGS	AZPAE15058		25367914	PRJNA264310	SAMN03105755	GCA_000793225.1		JTMO00000000			6567883	66.22	6123
287.861	WGS	AZPAE15057		25367914	PRJNA264310	SAMN03105754	GCA_000793205.1		JTMP00000000			6451298	66.43	6068
287.862	WGS	AZPAE15056		25367914	PRJNA264310	SAMN03105753	GCA_000793165.1		JTMQ00000000			6287511	66.49	5871
287.863	WGS	AZPAE15055		25367914	PRJNA264310	SAMN03105752	GCA_000793185.1		JTMR00000000			6360589	66.37	5866
287.864	WGS	AZPAE15054		25367914	PRJNA264310	SAMN03105751	GCA_000791385.1		JTMS00000000			6647129	65.96	6240
287.865	WGS	AZPAE15053		25367914	PRJNA264310	SAMN03105750	GCA_000790625.1		JTMT00000000			6522359	66.25	6104
287.866	WGS	AZPAE15052		25367914	PRJNA264310	SAMN03105749	GCA_000791465.1		JTMU00000000			6339616	66.38	5870
287.867	WGS	AZPAE15051		25367914	PRJNA264310	SAMN03105748	GCA_000792395.1		JTMV00000000			6814130	66.09	6368
287.868	WGS	AZPAE15050		25367914	PRJNA264310	SAMN03105747	GCA_000791665.1		JTMW00000000			6901290	65.78	6438
287.869	WGS	AZPAE15049		25367914	PRJNA264310	SAMN03105746	GCA_000789485.1		JTMX00000000			6259893	66.46	5816
287.870	WGS	AZPAE15048		25367914	PRJNA264310	SAMN03105745	GCA_000793135.1		JTMY00000000			6924072	65.73	6369
287.871	WGS	AZPAE15047		25367914	PRJNA264310	SAMN03105744	GCA_000790835.1		JTMZ00000000			6898282	66.03	6454
287.872	WGS	AZPAE15046		25367914	PRJNA264310	SAMN03105743	GCA_000790285.1		JTNA00000000			6345609	66.45	5909
287.873	WGS	AZPAE15045		25367914	PRJNA264310	SAMN03105742	GCA_000790985.1		JTNB00000000			6703034	66	6189
287.874	WGS	AZPAE15044		25367914	PRJNA264310	SAMN03105741	GCA_000792045.1		JTNC00000000			6555614	66.21	6123
287.875	WGS	AZPAE15043		25367914	PRJNA264310	SAMN03105740	GCA_000790765.1		JTND00000000			6978967	65.98	6522
287.876	WGS	AZPAE15042		25367914	PRJNA264310	SAMN03105739	GCA_000790465.1		JTNE00000000			6640508	66.27	6148
287.877	WGS	AZPAE15041		25367914	PRJNA264310	SAMN03105738	GCA_000790735.1		JTNF00000000			6739630	66.02	6284
287.878	WGS	AZPAE15040		25367914	PRJNA264310	SAMN03105737	GCA_000790915.1		JTNG00000000			6601216	66.23	6145
287.879	WGS	AZPAE15039		25367914	PRJNA264310	SAMN03105736	GCA_000790345.1		JTNH00000000			6697373	66.07	6193
287.880	WGS	AZPAE15038		25367914	PRJNA264310	SAMN03105735	GCA_000790115.1		JTNI00000000			6261442	66.49	5828
287.881	WGS	AZPAE15037		25367914	PRJNA264310	SAMN03105734	GCA_000789935.1		JTNJ00000000			7200442	65.83	6752
287.882	WGS	AZPAE15036		25367914	PRJNA264310	SAMN03105733	GCA_000789645.1		JTNK00000000			6412424	66.31	5951
287.883	WGS	AZPAE15035		25367914	PRJNA264310	SAMN03105732	GCA_000789495.1		JTNL00000000			6673047	66.09	6177
287.884	WGS	AZPAE15034		25367914	PRJNA264310	SAMN03105731	GCA_000793955.1		JTNM00000000			6794620	66.14	6321
287.885	WGS	AZPAE15033		25367914	PRJNA264310	SAMN03105730	GCA_000793725.1		JTNN00000000			6087226	66.4	5660
287.886	WGS	AZPAE15032		25367914	PRJNA264310	SAMN03105729	GCA_000791565.1		JTNO00000000			6484573	66.2	6054
287.887	WGS	AZPAE15031		25367914	PRJNA264310	SAMN03105728	GCA_000791855.1		JTNP00000000			6894718	65.98	6456
287.888	WGS	AZPAE15030		25367914	PRJNA264310	SAMN03105727	GCA_000791985.1		JTNQ00000000			6608631	66.18	6153
287.889	WGS	AZPAE15029		25367914	PRJNA264310	SAMN03105726	GCA_000792145.1		JTNR00000000			6860916	66.03	6395
287.890	WGS	AZPAE15028		25367914	PRJNA264310	SAMN03105725	GCA_000792265.1		JTNS00000000			6834546	65.7	6222
287.891	WGS	AZPAE15027		25367914	PRJNA264310	SAMN03105724	GCA_000791235.1		JTNT00000000			6438293	66.36	5972
287.892	WGS	AZPAE15026		25367914	PRJNA264310	SAMN03105723	GCA_000791365.1		JTNU00000000			6358197	66.41	5905
287.893	WGS	AZPAE15025		25367914	PRJNA264310	SAMN03105722	GCA_000791005.1		JTNV00000000			6726954	66	6226
287.894	WGS	AZPAE15024		25367914	PRJNA264310	SAMN03105721	GCA_000790585.1		JTNW00000000			6776478	66	6272
287.895	WGS	AZPAE15023		25367914	PRJNA264310	SAMN03105720	GCA_000793125.1		JTNX00000000			6351355	66.4	5945
287.896	WGS	AZPAE15022		25367914	PRJNA264310	SAMN03105719	GCA_000793105.1		JTNY00000000			6219362	66.56	5791
287.897	WGS	AZPAE15021		25367914	PRJNA264310	SAMN03105718	GCA_000793085.1		JTNZ00000000			6686424	66.05	6203
287.898	WGS	AZPAE15020		25367914	PRJNA264310	SAMN03105717	GCA_000793055.1		JTOA00000000			7163187	65.8	6764
287.899	WGS	AZPAE15019		25367914	PRJNA264310	SAMN03105716	GCA_000793045.1		JTOB00000000			6717129	66.06	6253
287.900	WGS	AZPAE15018		25367914	PRJNA264310	SAMN03105715	GCA_000793025.1		JTOC00000000			6933997	66.06	6456
287.901	WGS	AZPAE15017		25367914	PRJNA264310	SAMN03105714	GCA_000793005.1		JTOD00000000			6594600	66.09	6089
287.902	WGS	AZPAE15016		25367914	PRJNA264310	SAMN03105713	GCA_000792965.1		JTOE00000000			6756824	65.84	6293
287.903	WGS	AZPAE15015		25367914	PRJNA264310	SAMN03105712	GCA_000792975.1		JTOF00000000			6804229	66.08	6319
287.904	WGS	AZPAE15014		25367914	PRJNA264310	SAMN03105711	GCA_000792945.1		JTOG00000000			6400436	66.42	5915
287.905	WGS	AZPAE15013		25367914	PRJNA264310	SAMN03105710	GCA_000792925.1		JTOH00000000			6358832	66.41	5909
287.906	WGS	AZPAE15012		25367914	PRJNA264310	SAMN03105709	GCA_000792895.1		JTOI00000000			6462525	66.32	6032
287.907	WGS	AZPAE15011		25367914	PRJNA264310	SAMN03105708	GCA_000792885.1		JTOJ00000000			6590340	65.85	6124
287.908	WGS	AZPAE15010		25367914	PRJNA264310	SAMN03105707	GCA_000792855.1		JTOK00000000			7014236	65.9	6548
287.909	WGS	AZPAE15009		25367914	PRJNA264310	SAMN03105706	GCA_000792845.1		JTOL00000000			6958019	65.85	6477
287.910	WGS	AZPAE15008		25367914	PRJNA264310	SAMN03105705	GCA_000792825.1		JTOM00000000			6345734	66.18	5928
287.911	WGS	AZPAE15007		25367914	PRJNA264310	SAMN03105704	GCA_000792805.1		JTON00000000			6814810	65.79	6348
287.912	WGS	AZPAE15006		25367914	PRJNA264310	SAMN03105703	GCA_000792785.1		JTOO00000000			6832413	65.95	6319
287.913	WGS	AZPAE15005		25367914	PRJNA264310	SAMN03105702	GCA_000792765.1		JTOP00000000			6889490	66.07	6493
287.914	WGS	AZPAE15004		25367914	PRJNA264310	SAMN03105701	GCA_000792745.1		JTOQ00000000			6345076	66.39	5863
287.915	WGS	AZPAE15003		25367914	PRJNA264310	SAMN03105700	GCA_000792725.1		JTOR00000000			6882469	66.11	6440
287.916	WGS	AZPAE15002		25367914	PRJNA264310	SAMN03105699	GCA_000792705.1		JTOS00000000			6802969	65.79	6315
287.917	WGS	AZPAE15001		25367914	PRJNA264310	SAMN03105698	GCA_000792675.1		JTOT00000000			6582180	66.3	6135
287.918	WGS	AZPAE15000		25367914	PRJNA264310	SAMN03105697	GCA_000792665.1		JTOU00000000			6858205	66	6393
287.919	WGS	AZPAE14999		25367914	PRJNA264310	SAMN03105696	GCA_000792635.1		JTOV00000000			6427887	66.3	5954
287.920	WGS	AZPAE14998		25367914	PRJNA264310	SAMN03105695	GCA_000792625.1		JTOW00000000			6712745	66.17	6279
287.921	WGS	AZPAE14997		25367914	PRJNA264310	SAMN03105694	GCA_000792605.1		JTOX00000000			6715214	65.98	6292
287.922	WGS	AZPAE14996		25367914	PRJNA264310	SAMN03105693	GCA_000792575.1		JTOY00000000			6459808	66.34	5973
287.923	WGS	AZPAE14995		25367914	PRJNA264310	SAMN03105692	GCA_000792565.1		JTOZ00000000			6389451	66.32	5955
287.924	WGS	AZPAE14994		25367914	PRJNA264310	SAMN03105691	GCA_000792545.1		JTPA00000000			6476787	66.07	6046
287.925	WGS	AZPAE14993		25367914	PRJNA264310	SAMN03105690	GCA_000792515.1		JTPB00000000			6914857	65.97	6452
287.926	WGS	AZPAE14992		25367914	PRJNA264310	SAMN03105689	GCA_000792505.1		JTPC00000000			6510002	66.3	6074
287.927	WGS	AZPAE14991		25367914	PRJNA264310	SAMN03105688	GCA_000792475.1		JTPD00000000			6467607	66.31	5995
287.928	WGS	AZPAE14990		25367914	PRJNA264310	SAMN03105687	GCA_000792465.1		JTPE00000000			6809137	66.09	6361
287.929	WGS	AZPAE14989		25367914	PRJNA264310	SAMN03105686	GCA_000792445.1		JTPF00000000			6549370	66.19	6042
287.930	WGS	AZPAE14988		25367914	PRJNA264310	SAMN03105685	GCA_000792425.1		JTPG00000000			6387737	66.41	5907
287.931	WGS	AZPAE14987		25367914	PRJNA264310	SAMN03105684	GCA_000792385.1		JTPH00000000			6855155	66.02	6394
287.932	WGS	AZPAE14986		25367914	PRJNA264310	SAMN03105683	GCA_000792365.1		JTPI00000000			6471510	66.35	6029
287.933	WGS	AZPAE14985		25367914	PRJNA264310	SAMN03105682	GCA_000792345.1		JTPJ00000000			6781336	66.05	6326
287.934	WGS	AZPAE14984		25367914	PRJNA264310	SAMN03105681	GCA_000792325.1		JTPK00000000			6809111	66.07	6320
287.951	WGS	AZPAE14983		25367914	PRJNA264310	SAMN03105680	GCA_000792305.1		JTPL00000000			7082650	65.77	6607
287.952	WGS	AZPAE14982		25367914	PRJNA264310	SAMN03105679	GCA_000792285.1		JTPM00000000			6455689	66.31	5988
287.953	WGS	AZPAE14981		25367914	PRJNA264310	SAMN03105678	GCA_000792245.1		JTPN00000000			6276540	66.48	5833
287.954	WGS	AZPAE14980		25367914	PRJNA264310	SAMN03105677	GCA_000792225.1		JTPO00000000			6768315	66.16	6326
287.955	WGS	AZPAE14979		25367914	PRJNA264310	SAMN03105676	GCA_000792205.1		JTPP00000000			6751299	66.03	6274
287.956	WGS	AZPAE14978		25367914	PRJNA264310	SAMN03105675	GCA_000792165.1		JTPQ00000000			7130480	65.74	6594
287.957	WGS	AZPAE14977		25367914	PRJNA264310	SAMN03105674	GCA_000792155.1		JTPR00000000			6336142	66.39	5868
287.958	WGS	AZPAE14976		25367914	PRJNA264310	SAMN03105673	GCA_000792115.1		JTPS00000000			6631621	66.06	6170
287.959	WGS	AZPAE14975		25367914	PRJNA264310	SAMN03105672	GCA_000792095.1		JTPT00000000			6369755	66.42	5909
287.960	WGS	AZPAE14974		25367914	PRJNA264310	SAMN03105671	GCA_000792085.1		JTPU00000000			7085926	65.75	6554
287.961	WGS	AZPAE14973		25367914	PRJNA264310	SAMN03105670	GCA_000792065.1		JTPV00000000			7183565	65.78	6708
287.962	WGS	AZPAE14972		25367914	PRJNA264310	SAMN03105669	GCA_000792025.1		JTPW00000000			6399923	66.38	5956
287.963	WGS	AZPAE14971		25367914	PRJNA264310	SAMN03105668	GCA_000792005.1		JTPX00000000			6203904	66.44	5736
287.964	WGS	AZPAE14970		25367914	PRJNA264310	SAMN03105667	GCA_000791965.1		JTPY00000000			6920457	66.05	6528
287.965	WGS	AZPAE14969		25367914	PRJNA264310	SAMN03105666	GCA_000791945.1		JTPZ00000000			6832241	66	6429
287.966	WGS	AZPAE14968		25367914	PRJNA264310	SAMN03105665	GCA_000791915.1		JTQA00000000			6897223	66	6398
287.967	WGS	AZPAE14967		25367914	PRJNA264310	SAMN03105664	GCA_000791885.1		JTQB00000000			6567690	66.17	6082
287.968	WGS	AZPAE14965		25367914	PRJNA264310	SAMN03105663	GCA_000791905.1		JTQC00000000			7042523	65.91	6633
287.969	WGS	AZPAE14964		25367914	PRJNA264310	SAMN03105662	GCA_000791835.1		JTQD00000000			7039582	65.91	6629
287.970	WGS	AZPAE14963		25367914	PRJNA264310	SAMN03105661	GCA_000791825.1		JTQE00000000			6380431	66.44	5949
287.971	WGS	AZPAE14962		25367914	PRJNA264310	SAMN03105660	GCA_000791805.1		JTQF00000000			6963110	65.83	6490
287.972	WGS	AZPAE14961		25367914	PRJNA264310	SAMN03105659	GCA_000791785.1		JTQG00000000			6441305	66.34	5985
287.973	WGS	AZPAE14960		25367914	PRJNA264310	SAMN03105658	GCA_000791765.1		JTQH00000000			6370668	66.45	5891
287.974	WGS	AZPAE14959		25367914	PRJNA264310	SAMN03105657	GCA_000791735.1		JTQI00000000			6743682	66.15	6265
287.975	WGS	AZPAE14958		25367914	PRJNA264310	SAMN03105656	GCA_000791725.1		JTQJ00000000			7130390	65.74	6593
287.976	WGS	AZPAE14957		25367914	PRJNA264310	SAMN03105655	GCA_000791705.1		JTQK00000000			6621214	66.11	6188
287.977	WGS	AZPAE14956		25367914	PRJNA264310	SAMN03105654	GCA_000791685.1		JTQL00000000			7110106	65.36	6618
287.978	WGS	AZPAE14955		25367914	PRJNA264310	SAMN03105653	GCA_000791635.1		JTQM00000000			6375587	66.42	5893
287.979	WGS	AZPAE14954		25367914	PRJNA264310	SAMN03105652	GCA_000791625.1		JTQN00000000			6368200	66.43	5937
287.980	WGS	AZPAE14953		25367914	PRJNA264310	SAMN03105651	GCA_000791605.1		JTQO00000000			6809063	66.15	6294
287.981	WGS	AZPAE14952		25367914	PRJNA264310	SAMN03105650	GCA_000791585.1		JTQP00000000			6365190	66.39	5896
287.982	WGS	AZPAE14951		25367914	PRJNA264310	SAMN03105649	GCA_000791545.1		JTQQ00000000			6876017	65.85	6397
287.983	WGS	AZPAE14950		25367914	PRJNA264310	SAMN03105648	GCA_000791525.1		JTQR00000000			6332797	66.24	5879
287.984	WGS	AZPAE14949		25367914	PRJNA264310	SAMN03105647	GCA_000791495.1		JTQS00000000			6899528	66.05	6397
287.985	WGS	AZPAE14948		25367914	PRJNA264310	SAMN03105646	GCA_000791485.1		JTQT00000000			6828755	65.86	6322
287.986	WGS	AZPAE14947		25367914	PRJNA264310	SAMN03105645	GCA_000794045.1		JTQU00000000			6482138	66.33	6043
287.987	WGS	AZPAE14946		25367914	PRJNA264310	SAMN03105644	GCA_000791445.1		JTQV00000000			6592636	66.29	6169
287.988	WGS	AZPAE14945		25367914	PRJNA264310	SAMN03105643	GCA_000791405.1		JTQW00000000			6866953	66.05	6346
287.989	WGS	AZPAE14944		25367914	PRJNA264310	SAMN03105642	GCA_000791425.1		JTQX00000000			6824257	66.11	6386
287.990	WGS	AZPAE14943		25367914	PRJNA264310	SAMN03105641	GCA_000791345.1		JTQY00000000			6250531	66.53	5785
287.991	WGS	AZPAE14942		25367914	PRJNA264310	SAMN03105640	GCA_000794025.1		JTQZ00000000			6787557	66.05	6324
287.992	WGS	AZPAE14941		25367914	PRJNA264310	SAMN03105639	GCA_000789725.1		JTRA00000000			6881480	65.98	6335
287.993	WGS	AZPAE14940		25367914	PRJNA264310	SAMN03105638	GCA_000793945.1		JTRB00000000			6929735	65.97	6507
287.994	WGS	AZPAE14939		25367914	PRJNA264310	SAMN03105637	GCA_000793595.1		JTRC00000000			6351078	66.39	5835
287.995	WGS	AZPAE14938		25367914	PRJNA264310	SAMN03105636	GCA_000793645.1		JTRD00000000			6900154	66.12	6496
287.996	WGS	AZPAE14937		25367914	PRJNA264310	SAMN03105635	GCA_000793785.1		JTRE00000000			6892469	65.86	6408
287.997	WGS	AZPAE14936		25367914	PRJNA264310	SAMN03105634	GCA_000793585.1		JTRF00000000			6265859	66.33	5818
287.998	WGS	AZPAE14935		25367914	PRJNA264310	SAMN03105633	GCA_000794095.1		JTRG00000000			6764634	66.22	6318
287.999	WGS	AZPAE14934		25367914	PRJNA264310	SAMN03105632	GCA_000793905.1		JTRH00000000			6346157	66.37	5915
